# Supplementary material for: Pore structure and particle shape modulates the protein corona of mesoporous silica particles
Source: Royal Society of Chemistry journal article supplement (doi:10.1039/d0ma00188k), 2020-01-01
Supplement: d0ma00188k1.pdf [file d0ma00188k1.pdf]

Electronic Supporting Information

## Pore structure and particle shape modulates the protein corona of mesoporous silica particles

Kalpeshkumar Giri, Inga Kuschnerus, Michael Lau, Juanfang Ruan, Alfonso Garcia-Bennett

|                                                                                                                            | Page         |
|----------------------------------------------------------------------------------------------------------------------------|--------------|
| <b>Experimental Section</b>                                                                                                | <b>1-2</b>   |
| <b>Material Characterisation and Methods</b>                                                                               | <b>3-4</b>   |
| <b>Figure S1</b> XRD patterns of as synthesized and calcined samples                                                       | <b>5</b>     |
| <b>Figure S2</b> Representative SEM and TEM images of the protein corona                                                   | <b>6</b>     |
| <b>Figure S3</b> Coomassie stained protein SDS-PAGE gel for AS and CAL-MSPs at T <sub>10</sub>                             | <b>6</b>     |
| <b>Figure S4</b> Venn diagram displaying common proteins AS and CAL-MSPs at T <sub>10</sub>                                | <b>7</b>     |
| <b>Figure S5</b> Coomassie stained protein SDS-PAGE gel for MSPs at T <sub>30</sub> , T <sub>60</sub> and T <sub>120</sub> | <b>7</b>     |
| <b>Figure S6</b> Number and MW distribution of proteins in the hard corona of MSPs                                         | <b>8</b>     |
| <b>Figure S7</b> Bioinformatics classification of the hard corona of calcined MSPs                                         | <b>8</b>     |
| <b>Table S1.</b> Composition of the top 30 proteins of the hard corona of all MSPs                                         | <b>10-28</b> |
| <b>References</b>                                                                                                          | <b>28</b>    |

### Experimental Section

All chemicals were purchased from Sigma-Aldrich (Sydney, Australia) and used as received.

#### **Mesoporous Particle Synthesis**

The method used for the preparation of **AMS-6S** mesoporous particles has been described previously and was used here with slight modification.<sup>1</sup> In the synthesis, the surfactant, N-Lauroyl-L-Alanine (1.25 g), was first added to 250 mL deionized water in a polypropylene bottle and kept in this bottle at 80 °C (200 rpm) for 12 hours. The surfactant solution was stirred for 10 min at 1000 rpm before adding a co-structure directing agent 3-aminopropyl triethoxysilane (1.25 g APES) and tetraethyl orthosilicate (6.25g TEOS) as the silica source. After addition, above the solution was stirred at 1000 rpm for 1 hour. The speed was reduced to 500 rpm after 12 hours and stopped stirring and kept the bottle at RT for 12 hours. The surfactant was removed by calcination at 550 °C (3 hours in flowing air).

The synthesis of **AMS-6F** followed a modified protocol previously reported.<sup>2</sup> N-Lauroyl-L-Alanine (0.80 g, C12AlaA) was dissolved in 160 g of water and left in static conditions in a

closed polypropylene bottle at 80 °C for one day, in order to allow the surfactant to dissolve completely. To the surfactant solution, co-structure directing agent (3-aminopropyl) trimethoxysilane (0.68 g, APMS) was added under vigorous stirring at 80°C for 1 minute. A polymeric non-ionic dispersant solution was prepared using Pluronic P123 (0.51 g) in 60 g of water in a separate polypropylene bottle and left to stir at room temperature for at least 12 hours. The dispersant solution was added to the surfactant solution and allowed to stir at 80°C for 12 min. After 12 min, TEOS (4.15 g) of was added to the solution and stirred for a further 10 min and subsequently stored at 80°C under the static condition for a period of 48 hours. The sample was hydrothermally treated at 100 °C for 24 hours, filtered, and dried at 95 °C overnight. The surfactant was removed by calcination at 550 °C (3 hours in flowing air) to give the final porous material.

The synthesis of **SBA-15** material followed the protocol previously reported.<sup>3</sup> Briefly, P123 (3.9 g), water (135 g), Hydrochloric acid (9.8 g, HCl), TEOS (8.2 g) was added into a propylene bottle and stirred at 40 °C for 20 hours. The bottle was then placed inside an oven at 100 °C for 48 hours. After 48 hours, the sample was filtered and dried at 60 °C overnight. The products were calcined as described above for AMS-6. The synthesis of **aminopropyl-functionalised SBA-15** followed the protocol described above but with the addition of APTES (0.4 g) together with TEOS.

**Solvent extraction** of as synthesised AMS-6S, AMS-6F, and SBA-15 (aminopropyl-functionalised) in HCl(37%)/EtOH solution (30:70) at 70 °C, (ratio 1 g:250 ml solution). After 12 hours the remaining solid was filtered and washed with ethanol before drying. The extracted amine functionalised AMS-6S, AMS-6F and SBA-15 materials was conjugated to rhodamine by reflux in ethanolic solution (at pH of 11 adjusted with 1M NaOH) for 6 hours at 90 °C.

### **Cellular uptake study**

Immortalized murine microglia cells (BV2) was kindly donated by Dr Lindsay Parker (Macquarie University, Centre for Nanoscale Biophotonics, Australia). Microglia cells were cultured in Dulbecco's Modified eagle media supplemented with 10% Fetal bovine serum (Thermo Fisher Scientific, Australia) and 1% Penicillin/Streptomycin (Thermo Fisher Scientific, Australia) at 37 °C, 5% CO<sub>2</sub>, and 95% fresh air. Cells of passage length between 10 to 15 days was used for the in vitro cell experiments.

The cellular uptake of rhodamine conjugated functionalised MSPs was quantified by the CytoFLEX S flow cytometer (Beckman coulter, Australia). BV2 cells were seeded on 24 well plates at an approximate seeding density of 180,000 cells. After 24 hour incubation with MSPs, cells were washed with PBS, and detached using TrypLE Express (Thermo Fisher Scientific, Australia). Cells were resuspended in PBS, and ten thousand events were collected for each sample and results analysed by CytExpert software (Beckman coulter).

### **Material Characterisation**

### **Powder X-ray diffraction (XRD)**

Powder X-ray diffraction (XRD) studies were performed on loaded samples and free drug to evaluate the crystallinity by a powder diffractometer (Bruker D8 Discover diffractometer) using Cu-K $\alpha$  radiation as X-Ray source ( $\lambda = 1.5406 \text{ \AA}$ ). The diffraction patterns were recorded between  $1-70^\circ 2\theta$ . The data were collected and analysed with DIFFRAC.SUITE™ software.

### **Nitrogen adsorption/desorption isotherms**

Textural properties were characterised using Nitrogen isotherms measurement on calcined and drug-loaded silica samples at liquid nitrogen temperature ( $-196^\circ \text{C}$ ) using a Micromeritics TriStar II volumetric adsorption analyzer (Micromeritics Instrument Corporation, GA, USA). Before the measurements, all samples were dried and degassed for 12 hours at  $100^\circ \text{C}$ . ( $40^\circ \text{C}$  for drug loaded samples to avoid drug degradation). Specific surface areas were calculated by applying the Brunauer–Emmett–Teller (BET) method in the relative pressure range between 0.05 and 0.2. The total mesopore volume was considered from the amount of gas adsorbed at  $P/P_0 = 0.95$ .

### **Scanning Electron Microscopy (SEM) and cryo Transmission electron microscopy (cryo-TEM)**

SEM was used to study morphology and topography of the particles and their surfaces as well as their size by using a JSM-7401F scanning electron microscope (JEOL Ltd., Tokyo, Japan) operating at  $1-2 \text{ kV}$  with no gold coating. For cryo-TEM imaging,  $4.5 \mu\text{l}$  of sample was placed onto a glow-discharged Quantifoil copper grid followed by blotting with filter paper for 2.5 seconds. The grid was plunged into liquid ethane with a Leica EM GP freeze plunger (Leica, Germany) and stored in liquid nitrogen. Electron micrographs were obtained with a FEI Talos Arctica TEM (Thermo Fisher Scientific, USA) operating at  $200 \text{ kV}$ .

### **Dynamic light scattering (DLS)**

Hydrodynamic diameter and zeta potential measurements were performed by DLS a Zetasizer ZS (Malver Instrument, UK) at  $25^\circ \text{C}$  with a He-Ne laser ( $633 \text{ nm}$ ,  $4 \text{ mW}$  output power) as a light source. NP dispersions ( $10 \mu\text{L}$ ,  $1 \text{ mg/mL}$ ) were measured in  $1 \text{ mL}$  in filtered phosphate buffer saline (PBS).

### **Protein corona formation and analysis:**

#### **Sodium dodecyl sulphate polyacrylamide gel electrophoresis (SDS-PAGE)**

Particles were incubated with bovine serum 100% for 10, 30 and 120 mins. Subsequently, the samples were washed to remove the unbound and loosely bound proteins (soft corona), and then the hard corona coated mesoporous silica particles were mixed with  $20 \mu\text{L}$  of lysis buffer,<sup>4</sup> and boiled for 5min at  $95^\circ \text{C}$ . Samples were then loaded in NUPAGE 4-12% BT GEL of 12 wells (Life Technologies), and the gel was run for 55-60 min at  $200 \text{ mV}$  in 20 times diluted MOPS SDS Running Buffer ( $10\times$ , Thermo Scientific). Staining was performed with Coomassie Brilliant Blue R-250 Staining Solutions Kit (Bio-Rad) for 2 hours, followed by washing in Milli-Q water for 2–3 days.

### **Mass spectrometry**

After performing SDS-PAGE, gel bands were excised ( 4 fraction per lane) from the gel and dehydrated using acetonitrile, followed by vacuum centrifugation. Dried gel pieces were reduced with 10 mM dithiothreitol and alkylated with 55 mM iodoacetamide. Gel pieces were then washed alternately with 25 mM ammonium bicarbonate, followed by acetonitrile. This process was repeated, and the gel pieces dried by vacuum centrifugation. Samples were digested with trypsin overnight at 37 °C. Peptide extraction was performed using a formic acid (2%) and acetonitrile (50%) solution. The extracted peptide solution was dried using a vacuum centrifuge, and peptides were reconstituted in 0.1% formic acid solution. Peptide extraction was performed using a formic acid (2%) and acetonitrile (50%) solution. The extracted peptide solution was dried using a vacuum centrifuge and peptides were reconstituted in 0.1% formic acid solution. Analysis of peptides and peptide fragments was performed using liquid chromatography-tandem mass spectrometry (LC-MS/MS) on a Q-Exactive hybrid Quadrupole Orbitrap mass spectrometer (Thermo). An in-house packed trap (Halo® 2.7 µm 160 Å ES-C18, 100 µm x 3.5 cm) and analytical column (Halo® 2.7 µm 160 Å ES-C18, 75 µm x 10 cm) were used for sample application. Prior to the mass spectrometry, high performance liquid chromatography (HPLC) separation was performed using nanoflow liquid chromatography (EASY-nLC™ II, Thermo). A linear gradient of buffers A (2% v/v acetonitrile, 0.1% v/v formic acid) and B (99.9% v/v acetonitrile, 0.1% v/v formic acid) was used for the elution of peptides. The starting gradient was 1-50% buffer B for 50 minutes followed by increase in buffer B concentration from 50 to 85% for two minutes and column washing at 85% of buffer B for 8 minutes. The flow rate was kept constant at 300 nl/min during the gradient. The mass spectrometry spectral acquisition was performed in the scanning range of 350-2000 m/z in positive mode. For the tandem mass spectrometry analysis, HCD fragmentation of the top 10 most intense precursor ions was performed at a normalised collision energy of 30% (Xcalibur, Thermo). Three technical replicates per samples were performed. Each replicate was injected once for LCMS experiment Raw data files, obtained from Xcalibur software (3.1.66.10 Version), were submitted to MaxQuant 1.5.2.8 which incorporated the Andromeda search engine for protein identification and label free intensity- based quantification. Data were searched against the Bos Taurus (Bovine) Uniprot complete proteome reference database downloaded on September 09, 2017. Above, searches specified trypsin as the proteolytic enzyme with up to two missed cleavages. Carbamidomethylation of cysteine and oxidation of methionine were set as fixed and variable modification, respectively. The monoisotopic mass tolerance for precursor ions and fragmentation ions were set to 10 ppm and 0.5 Da, respectively. One peptide per protein with maximum false discovery rates set 0.01 on peptide and protein levels. The outputs from MaxQuant were then filtered to remove known contaminants such as trypsin, human keratin. Protein abundance as a function of intensity was calculated from all qualified peptides corresponding to a particular protein. An average of triplicate analysis of adsorbed proteins was used for the calculation. The proteins were then listed in order of decreasing relative protein abundance (RPA). Protein

abundance/quantity calculated by this method was represented by unit-less numerical values.

**Fig. S1.** XRD patterns of as-synthesized, amine functionalised and calcined samples of AMS-6S, AMS-6F, and SBA-15 mesoporous silica particles.

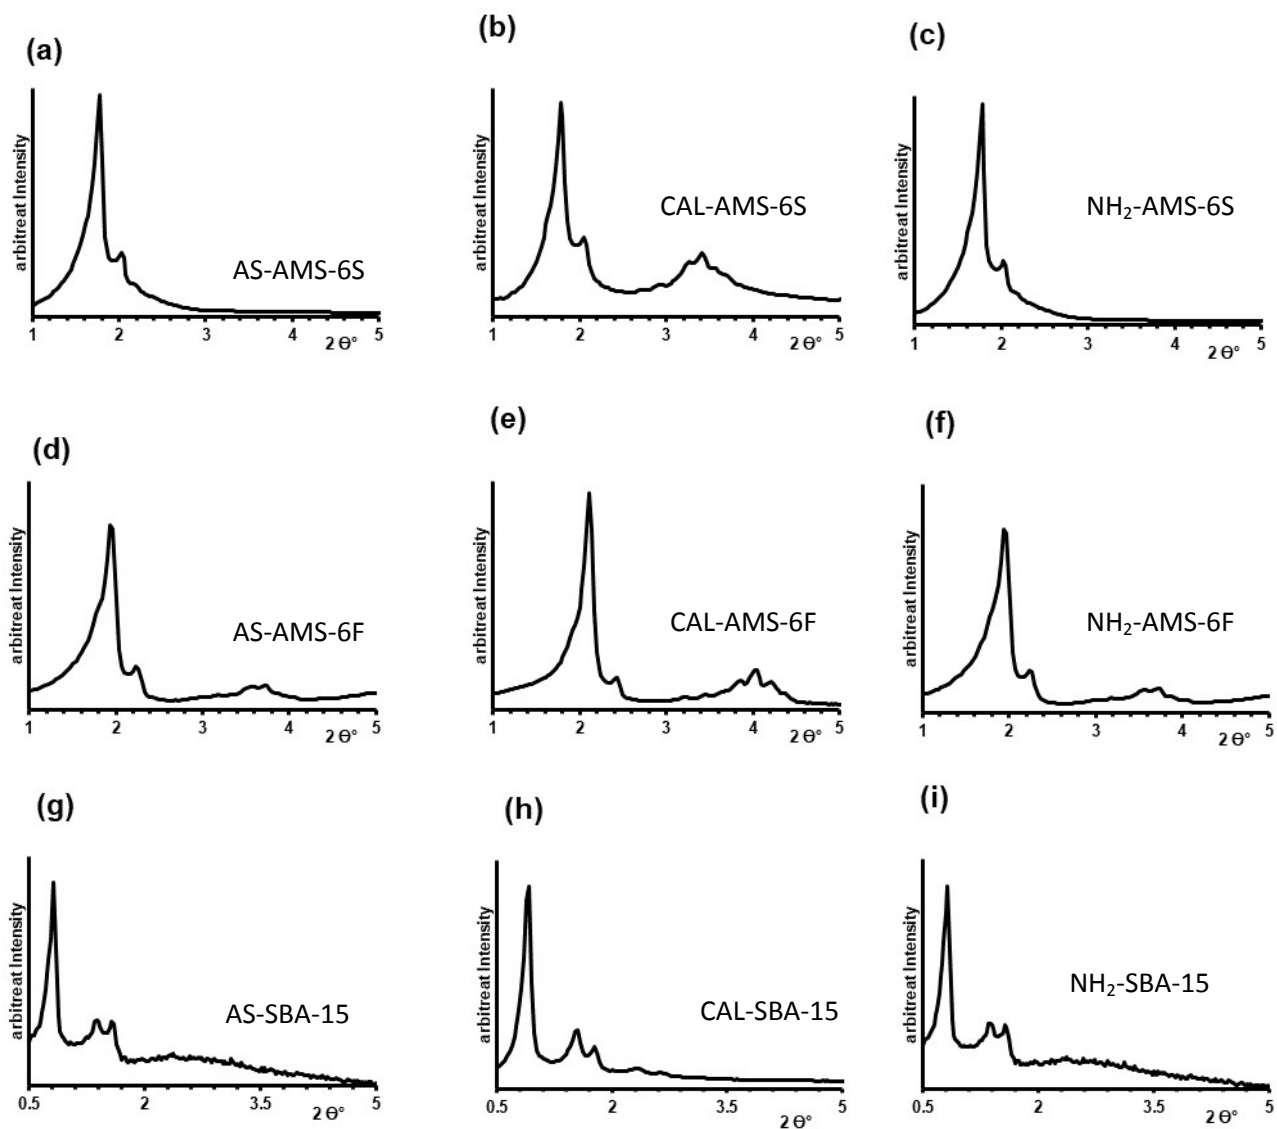

**Fig. S2** Representative SEM images of lyophilised samples of the soft corona of calcined MSPs (a) AMS-6F-T<sub>10</sub>, (b) SBA-15T<sub>30</sub>, and (c) AMS-6ST<sub>120</sub>, showing agglomeration and a surface protein coating. TEM images of lyophilised samples of the hard corona of (e) AMS-6FT<sub>120</sub>, (f) SBA-15T<sub>30</sub> and (g) AMS-6ST<sub>120</sub>, showing significant contrast surrounding individual particles, except for AMS-6S which shows a homogenous thin layer surrounding the particle. Scale bars equal 200 nm. Images are representative of all incubation time points.

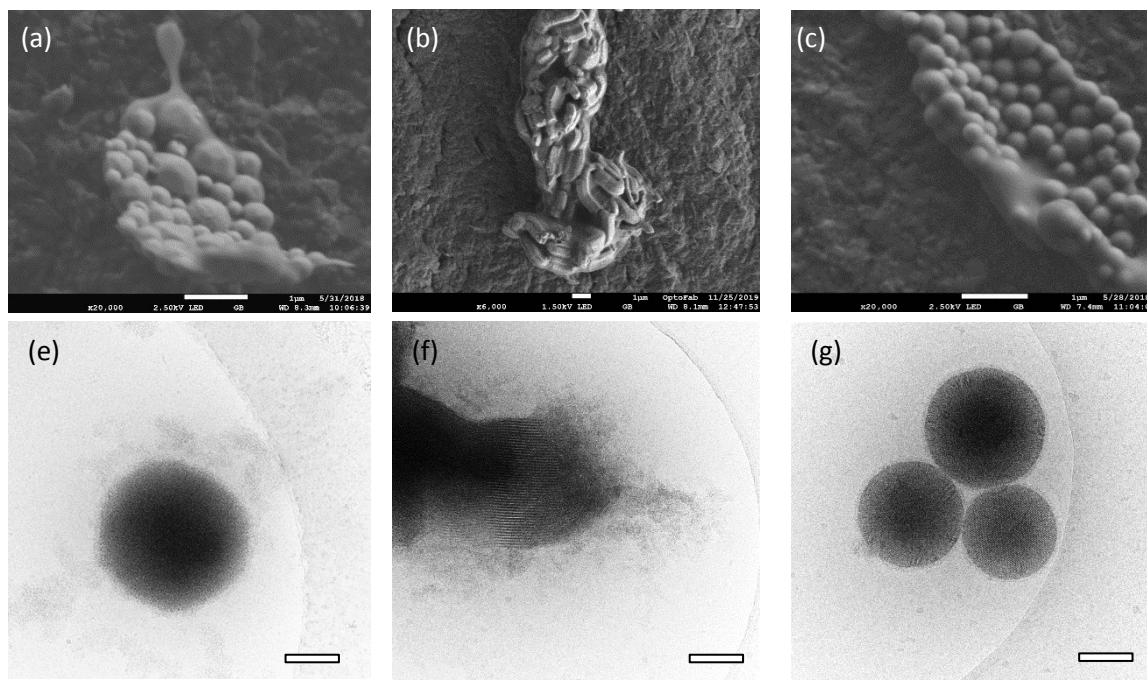

**Fig. S3** Comparison of protein adsorption profiles on as synthesised (AS) and calcined (CAL) MSPs after protein corona formation for 10 min (T<sub>10</sub>) and three times washing cycle in water by Coomassie stained protein SDS-PAGE gel.

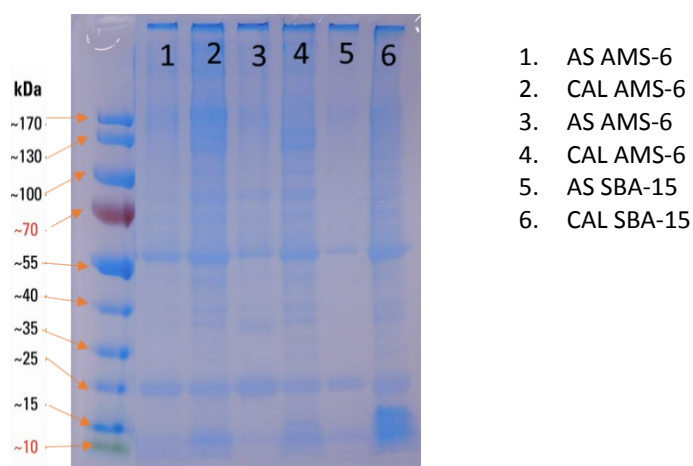

**Fig. S4** Venn diagram displaying the number of unique and common proteins identified in the formed hard coronas of AS and CAL-MSPs after incubation at  $T_{10}$  in BS, and their respective overlaps.

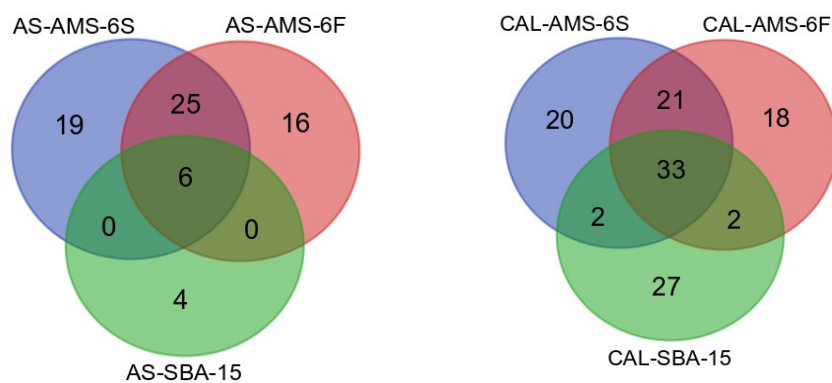

**Fig. S5** Comparison of protein adsorption profiles of MSPs at different incubations times in BS, by Coomassie stained protein SDS-PAGE gels recorded after a third washing cycle (experimental triplicates are shown).

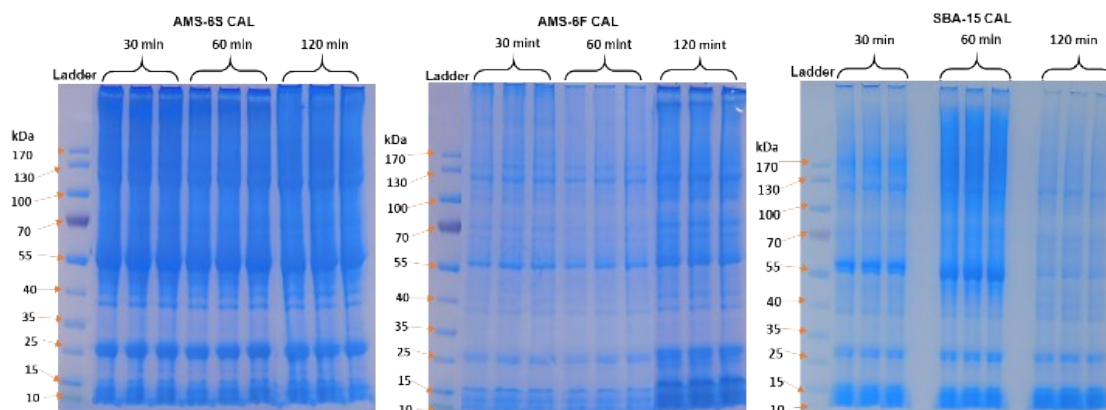

**Fig. S6** (a) Total number of proteins adsorbed onto calcined MSPs as a function of incubation time in FBS. (b) Classification of top 30 identified corona proteins according to their molecular mass for CAL-AMS-6S, CAL-AMS-F and CAL-SBA-15 as a function of incubation time.

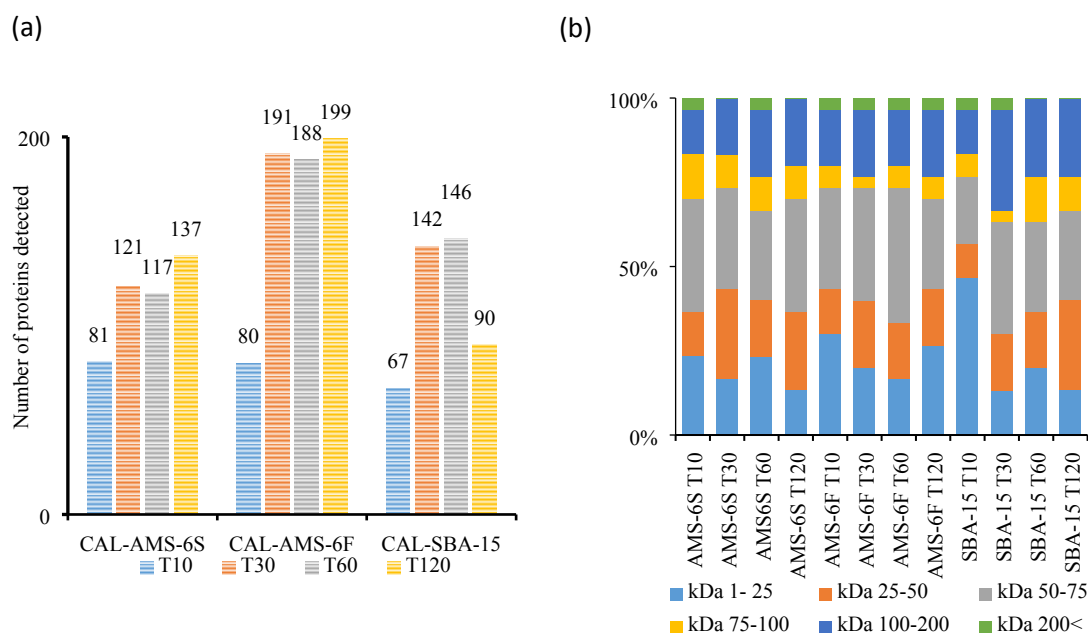

**Fig. S7** Bioinformatics classification of the specific hard corona of calcined MSPs incubated at different times in BS based on (a) protein class, (b) biological process, (c) molecular pathway and (d) function.

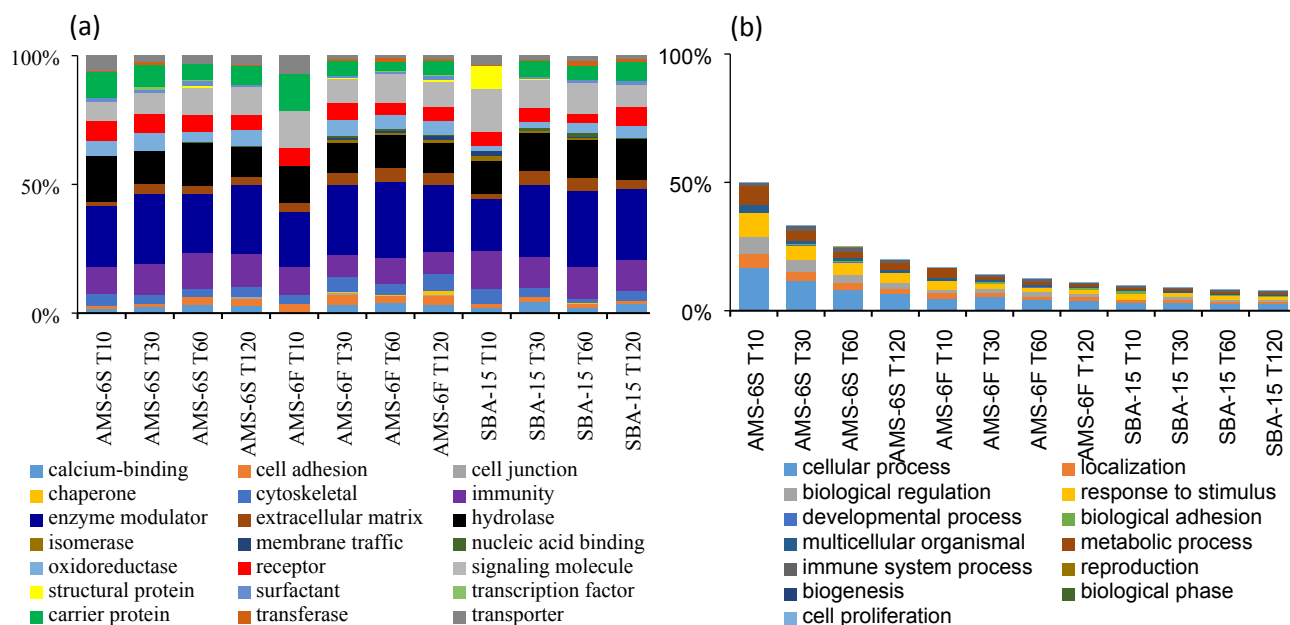



# Electronic Supporting Information

(c)

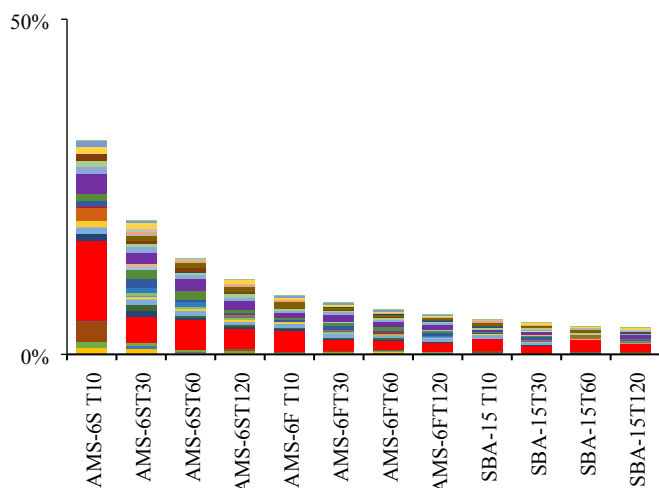

(d)

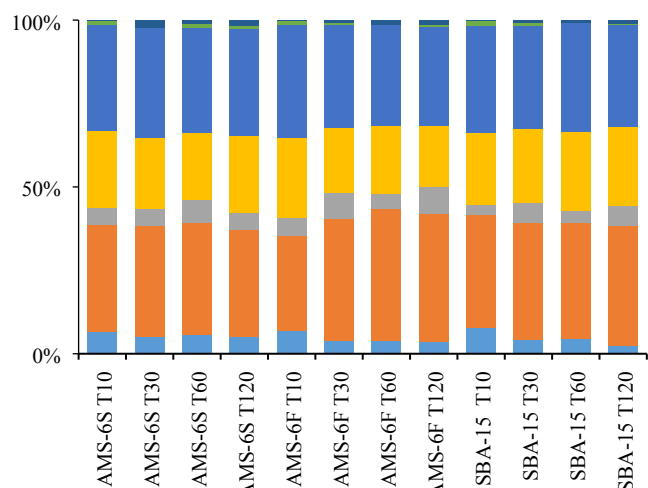

- Adenine and hypoxanthine salvage
- Adrenaline and noradrenaline biosynthesis
- Alzheimer disease-amyloid secretase
- Alzheimer disease-presenilin
- Angiogenesis
- Angiotensin II-stimulated signaling through G proteins and beta-arrestin
- Apoptosis signaling pathway
- Axon guidance mediated by netrin
- B cell activation
- Blood coagulation
- Cadherin signaling
- CCKR signaling map
- Cytoskeletal regulation by Rho GTPase
- Dopamine receptor mediated signaling
- EGF receptor signaling pathway
- FAS signaling pathway
- FGF signaling
- Fructose galactose metabolism
- Glycolysis
- Gonadotropin-releasing hormone receptor
- Heterotrimeric G-protein signaling pathway-Gi alpha and Gs alpha mediated
- Heterotrimeric G-protein signaling pathway-Gq alpha and Go alpha mediated
- Huntington disease
- Inflammation mediated by chemokine and cytokine signaling
- Insulin/IGF pathway-mitogen activated protein kinase kinase/MAP kinase cascade
- Insulin/IGF pathway-protein kinase B signaling cascade
- Integrin signalling
- Nicotine pharmacodynamics
- Nicotinic acetylcholine receptor signaling
- p53 pathway
- Parkinson disease
- Phenylethylamine degradation
- PI3 kinase pathway
- Plasminogen activating cascade
- Proline biosynthesis
- Purine metabolism
- Pyruvate metabolism
- T cell activation
- Toll receptor signaling
- Vitamin D metabolism
- Wnt signaling pathway
- Xanthine and guanine salvage

- molecular transducer
- binding
- structural molecule
- molecular function regulator
- catalytic activity
- transporter
- transcription regulator

**Fig. S8** The composition of the most abundant proteins as determined by LC-MS of the hard protein corona of amine functionalised NH<sub>2</sub>-MSPs as a function of incubation time at 30 and 120 mins. in BS.

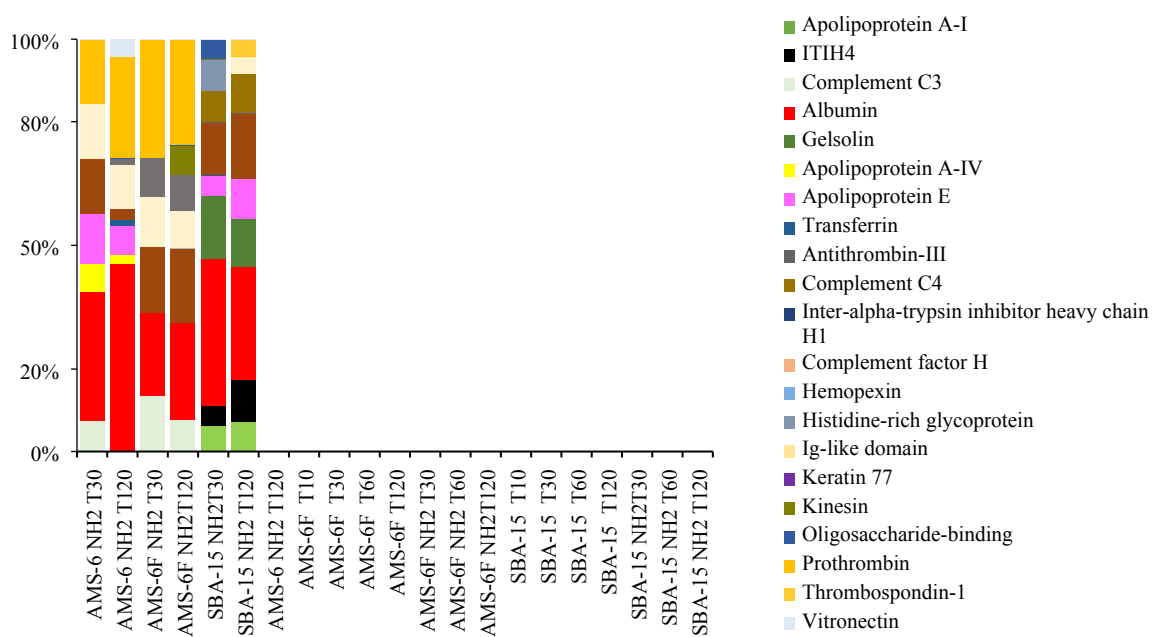

**Table S1.** Composition of the top 30 proteins of the hard corona of MSPs in this work and their relative abundance, after different incubation times in BS.

| AS-AMS-6ST <sub>10</sub> |                                             |        |       |      |
|--------------------------|---------------------------------------------|--------|-------|------|
| Accession Number         | Entry name                                  | Mass   | %RPA  | SD   |
| P15497                   | Apolipoprotein A-I                          | 30.28  | 33.44 | 2.36 |
| A0A140T897               | Serum albumin                               | 69.32  | 17.68 | 1.94 |
| Q2UVX4                   | Complement C3                               | 187.25 | 9.12  | 0.77 |
| P00735                   | Prothrombin                                 | 70.51  | 5.08  | 0.56 |
| F1N3Q7                   | Apolipoprotein A4                           | 52.29  | 4.13  | 0.33 |
| Q7SIH1                   | Alpha-2-macroglobulin                       | 167.58 | 3.85  | 0.18 |
| Q29443                   | Transferrin                                 | 77.75  | 3.36  | 0.20 |
| P35541                   | Serum amyloid A                             | 14.52  | 2.85  | 0.50 |
| F1MMD7                   | Inter-alpha-trypsin inhibitor H4            | 101.51 | 2.41  | 0.69 |
| P81644                   | Apolipoprotein A-II                         | 11.20  | 2.12  | 0.09 |
| A6QNZ7                   | Keratin 10                                  | 54.85  | 1.94  | 0.10 |
| A0A140T881               | Apolipoprotein E                            | 37.42  | 1.69  | 0.14 |
| P19035                   | Apolipoprotein C-III                        | 10.69  | 1.54  | 1.10 |
| Q148H7                   | Cytokeratin-79                              | 57.72  | 1.49  | 0.08 |
| P02070                   | Hemoglobin subunit beta                     | 15.95  | 1.09  | 0.32 |
| F1MSZ6                   | Serpin family C member 1                    | 48.86  | 1.03  | 0.05 |
| P01966                   | Hemoglobin subunit alpha                    | 15.18  | 0.94  | 0.13 |
| G3X6K8                   | Haptoglobin                                 | 41.98  | 0.89  | 0.07 |
| G8JKW7                   | Serpin A3-7                                 | 46.58  | 0.77  | 0.10 |
| Q3ZBS7                   | Vitronectin                                 | 53.58  | 0.71  | 0.07 |
| F1MMP5                   | Inter-alpha-trypsin inhibitor eavy chain H1 | 101.24 | 0.42  | 0.02 |
| Q32L76                   | Serum amyloid A-4                           | 14.69  | 0.41  | 0.09 |
| Q2KJF1                   | Alpha-1B-glycoprotein                       | 53.55  | 0.39  | 0.08 |
| A5PJE3                   | Fibrinogen alpha chain                      | 67.00  | 0.38  | 0.08 |
| Q5GN72                   | Alpha-1-acid glycoprotein                   | 23.16  | 0.34  | 0.02 |
| Q3SZV7                   | Hemopexin                                   | 52.21  | 0.30  | 0.21 |
| F1N1I6                   | Gelsolin                                    | 92.08  | 0.24  | 0.03 |
| F1MMK9                   | Kinesin family member 12                    | 53.00  | 0.18  | 0.00 |
| Q5E9B1                   | L-lactate dehydrogenase B chain             | 36.72  | 0.17  | 0.12 |
| A6QPP2                   | SERPIND1 protein                            | 55.21  | 0.12  | 0.09 |

| CAL-AMS-6ST <sub>10</sub> |                                  |        |       |      |
|---------------------------|----------------------------------|--------|-------|------|
| Accession Number          | Entry name                       | Mass   | %RPA  | SD   |
| P15497                    | Apolipoprotein A-I               | 30.28  | 18.32 | 1.42 |
| F1MMD7                    | Inter-alpha-trypsin inhibitor H4 | 101.51 | 13.70 | 1.42 |
| Q2UVX4                    | Complement C3                    | 187.25 | 10.09 | 0.92 |
| A0A140T897                | Serum albumin                    | 69.32  | 8.27  | 0.24 |
| F1N1I6                    | Gelsolin                         | 92.08  | 6.89  | 0.30 |

Electronic Supporting Information

|            |                          |        |      |      |
|------------|--------------------------|--------|------|------|
| P35541     | Serum amyloid A          | 14.52  | 5.35 | 0.74 |
| F1N3Q7     | Apolipoprotein A4        | 52.29  | 3.84 | 0.27 |
| AOA140T881 | Apolipoprotein E         | 37.42  | 3.62 | 0.15 |
| Q29443     | Transferrin              | 77.75  | 3.09 | 0.20 |
| Q7SIH1     | Alpha-2-macroglobulin    | 167.58 | 2.86 | 0.24 |
| P00735     | Prothrombin              | 70.51  | 1.96 | 0.08 |
| P02070     | Hemoglobin subunit beta  | 15.95  | 1.60 | 0.05 |
| P01966     | Hemoglobin subunit alpha | 15.18  | 1.53 | 0.12 |
| P19035     | Apolipoprotein C-III     | 10.69  | 1.38 | 0.07 |
| AOA140T8C8 | Kininogen-1              | 68.97  | 1.36 | 0.39 |
| F1N0I3     | Coagulation factor V     | 239.55 | 1.29 | 0.13 |
| A5PJE3     | Fibrinogen alpha chain   | 67.00  | 1.16 | 0.02 |
| Q28085     | Complement factor H      | 140.37 | 0.98 | 0.06 |
| A6QNZ7     | Keratin 10               | 54.85  | 0.90 | 0.05 |
| F1MSZ6     | Serpin family C member 1 | 48.86  | 0.89 | 0.08 |
| A5PJT7     | ECM1 protein             | 57.64  | 0.76 | 0.05 |
| P81644     | Apolipoprotein A-II      | 11.20  | 0.61 | 0.09 |
| Q3SZV7     | Hemopexin                | 52.21  | 0.59 | 0.03 |
| Q148H7     | (ytokeratin-79           | 57.72  | 0.58 | 0.07 |
| E1BJF9     | Serum amyloid A protein  | 19.64  | 0.55 | 0.04 |
| F1N3A1     | Thrombospondin-1         | 129.39 | 0.53 | 0.08 |
| E1B726     | Plasminogen              | 91.24  | 0.47 | 0.01 |
| Q2KJF1     | Alpha-1B-glycoprotein    | 53.55  | 0.45 | 0.07 |
| P12763     | Alpha-2-HS-glycoprotein  | 38.42  | 0.38 | 0.05 |
| E1BIK4     | C-X-C motif chemokine    | 12.60  | 0.38 | 0.28 |

| CAL-AMS-6ST <sub>30</sub> |                                     |        |       |      |
|---------------------------|-------------------------------------|--------|-------|------|
| Accession Number          | Entry name                          | Mass   | %RPA  | SD   |
| P02769                    | Serum albumin                       | 69.32  | 22.34 | 1.23 |
| P15497                    | Apolipoprotein A-I                  | 30.28  | 15.33 | 0.57 |
| Q2UVX4                    | Complement C3                       | 187.25 | 8.95  | 0.49 |
| Q7SIH1                    | Alpha-2-macroglobulin               | 167.57 | 8.05  | 0.33 |
| F1MMD7                    | Inter-alpha-trypsin inhibitor H4    | 101.53 | 3.46  | 0.01 |
| Q3SZV7                    | Hemopexin                           | 52.21  | 3.43  | 0.25 |
| G5E604                    | Ig-like domain-containing protein   | 11.06  | 3.11  | 0.15 |
| Q28085                    | Complement factor H                 | 140.37 | 2.74  | 0.05 |
| F1N3Q7                    | Apolipoprotein A-IV                 | 42.99  | 2.72  | 0.47 |
| AOA140T881                | Apolipoprotein E                    | 36.04  | 2.49  | 0.23 |
| F1MLW7                    | Ig-like domain-containing protein   | 24.40  | 1.78  | 0.13 |
| F1N1I6                    | Gelsolin                            | 85.69  | 1.62  | 0.15 |
| P06868                    | Plasminogen                         | 91.22  | 1.45  | 0.03 |
| Q29443                    | Transferrin                         | 75.83  | 1.38  | 0.03 |
| Q8SPP7                    | Peptidoglycan recognition protein 1 | 21.06  | 1.36  | 0.05 |

Electronic Supporting Information

|            |                         |        |      |      |
|------------|-------------------------|--------|------|------|
| Q2KIT0     | Protein HP-20 homolog   | 20.65  | 1.12 | 0.35 |
| P00735     | Prothrombin             | 70.51  | 1.11 | 0.06 |
| F1N3A1     | Thrombospondin-1        | 129.39 | 1.10 | 0.04 |
| F1MSZ6     | Antithrombin-III        | 52.44  | 0.94 | 0.09 |
| Q2KIS7     | Tetranectin             | 22.14  | 0.86 | 0.12 |
| A5PJE3     | Fibrinogen alpha chain  | 67.00  | 0.81 | 0.05 |
| P12763     | Alpha-2-HS-glycoprotein | 38.42  | 0.79 | 0.16 |
| P81187     | Complement factor B     | 85.41  | 0.67 | 0.07 |
| AOA140T843 | Beta-2-glycoprotein 1   | 38.25  | 0.61 | 0.16 |
| Q2KJF1     | Alpha-1B-glycoprotein   | 53.55  | 0.60 | 0.05 |
| Q3MHN2     | Complement component C9 | 62.00  | 0.60 | 0.04 |
| G3MYU2     | Keratin 77              | 66.02  | 0.59 | 0.06 |
| E1BJF9     | Serum amyloid A protein | 14.60  | 0.56 | 0.05 |
| P02070     | Hemoglobin subunit beta | 15.95  | 0.50 | 0.02 |
| P19035     | Apolipoprotein C-III    | 10.69  | 0.48 | 0.05 |

| CAL-AMS-6ST <sub>60</sub> |                                          |        |       |      |
|---------------------------|------------------------------------------|--------|-------|------|
| Accession Number          | Entry name                               | Mass   | %RPA  | SD   |
| P02769                    | Serum albumin                            | 69.32  | 22.55 | 0.95 |
| P15497                    | Apolipoprotein A-I                       | 30.28  | 15.61 | 0.79 |
| Q2UVX4                    | Complement C3                            | 187.25 | 7.86  | 0.74 |
| Q7SIH1                    | Alpha-2-macroglobulin                    | 167.57 | 7.67  | 0.29 |
| F1N3Q7                    | Apolipoprotein A-IV                      | 42.99  | 4.22  | 0.28 |
| G5E604                    | Ig-like domain-containing protein        | 11.06  | 3.59  | 0.35 |
| Q28085                    | Complement factor H (H factor 1)         | 140.37 | 3.37  | 0.28 |
| Q3SZV7                    | Hemopexin                                | 52.21  | 3.09  | 0.17 |
| F1MMD7                    | Inter-alpha-trypsin inhibitor H4         | 101.53 | 2.92  | 0.41 |
| F1N1I6                    | Gelsolin                                 | 85.69  | 2.44  | 0.18 |
| F1N3A1                    | Thrombospondin-1                         | 129.39 | 1.87  | 0.09 |
| Q8SPP7                    | Peptidoglycan recognition protein 1      | 21.06  | 1.71  | 0.14 |
| AOA140T881                | Apolipoprotein E                         | 36.04  | 1.71  | 0.26 |
| Q2KIS7                    | Tetranectin                              | 22.14  | 1.52  | 0.08 |
| P06868                    | Plasminogen                              | 91.22  | 1.26  | 0.06 |
| P00735                    | Prothrombin                              | 70.51  | 1.13  | 0.01 |
| Q2KIT0                    | Protein HP-20 homolog                    | 20.65  | 1.03  | 0.30 |
| F1MSZ6                    | Antithrombin-III                         | 52.44  | 0.91  | 0.05 |
| Q3ZBS7                    | Vitronectin                              | 53.58  | 0.88  | 0.27 |
| AOA140T843                | Beta-2-glycoprotein 1                    | 38.25  | 0.85  | 0.29 |
| Q29443                    | Transferrin                              | 75.83  | 0.85  | 0.10 |
| E1BJF9                    | Serum amyloid A protein                  | 14.60  | 0.81  | 0.03 |
| F1MLW7                    | Embryo-specific fibronectin 1 transcript | 24.40  | 0.79  | 0.06 |
| B8Y9S9                    | Fibrinogen alpha chain                   | 262.42 | 0.72  | 0.04 |
| A5PJE3                    | Complement factor B                      | 67.00  | 0.69  | 0.04 |

## Electronic Supporting Information

|        |                                   |        |      |      |
|--------|-----------------------------------|--------|------|------|
| P81187 | Alpha-1B-glycoprotein             | 85.41  | 0.69 | 0.08 |
| Q2KJF1 | Ig-like domain-containing protein | 53.55  | 0.61 | 0.06 |
| G5E5V1 | Alpha-2-HS-glycoprotein           | 14.48  | 0.47 | 0.07 |
| P12763 | Ceruloplasmin                     | 38.42  | 0.46 | 0.04 |
| F1N076 | Keratin 77                        | 123.81 | 0.43 | 0.02 |

| CAL-AMS-6ST <sub>120</sub> |                                              |        |       |      |
|----------------------------|----------------------------------------------|--------|-------|------|
| Accession Number           | Entry name                                   | Mass   | %RPA  | SD   |
| P15497                     | Apolipoprotein A-I                           | 30.28  | 19.94 | 0.86 |
| P02769                     | Serum albumin                                | 69.32  | 19.33 | 0.84 |
| Q2UVX4                     | Complement C3                                | 187.25 | 8.98  | 0.07 |
| Q7SIH1                     | Alpha-2-macroglobulin                        | 167.57 | 7.17  | 0.38 |
| F1MMD7                     | Inter-alpha-trypsin inhibitor heavy chain H4 | 101.53 | 4.14  | 0.56 |
| Q3SZV7                     | Hemopexin                                    | 52.21  | 3.43  | 0.09 |
| F1N3Q7                     | Apolipoprotein A-IV                          | 42.99  | 2.91  | 0.22 |
| Q28085                     | Complement factor H                          | 140.37 | 2.89  | 0.01 |
| G5E604                     | Ig-like domain-containing protein            | 11.06  | 2.56  | 0.03 |
| AOA140T881                 | Apolipoprotein E                             | 36.04  | 1.94  | 0.02 |
| F1N1I6                     | Gelsolin                                     | 85.69  | 1.79  | 0.10 |
| F1N3A1                     | Thrombospondin-1                             | 129.39 | 1.54  | 0.15 |
| Q2KIT0                     | Protein HP-20 homolog                        | 20.65  | 1.53  | 0.15 |
| F1MLW7                     | Antithrombin-III                             | 24.40  | 1.42  | 0.07 |
| F1MSZ6                     | Transferrin                                  | 52.44  | 1.11  | 0.08 |
| Q29443                     | Plasminogen                                  | 75.83  | 1.08  | 0.06 |
| P06868                     | Prothrombin                                  | 91.22  | 1.06  | 0.01 |
| P00735                     | Tetranectin                                  | 70.51  | 1.05  | 0.04 |
| E1BH06                     | Peptidoglycan recognition protein 1          | 192.76 | 0.86  | 0.05 |
| Q8SPP7                     | Alpha-2-HS-glycoprotein                      | 21.06  | 0.81  | 0.02 |
| P12763                     | Fibrinogen alpha chain                       | 38.42  | 0.81  | 0.07 |
| A5PJE3                     | Serum amyloid A protein                      | 67.00  | 0.79  | 0.05 |
| E1BJF9                     | Complement factor B                          | 14.60  | 0.75  | 0.01 |
| P81187                     | Beta-2-glycoprotein 1                        | 85.41  | 0.70  | 0.02 |
| AOA140T843                 | Keratin 77                                   | 38.25  | 0.65  | 0.25 |
| G3MYU2                     | Alpha-1B-glycoprotein                        | 66.02  | 0.61  | 0.03 |
| Q2KJF1                     | Vitronectin                                  | 53.55  | 0.54  | 0.01 |
| Q3ZBS7                     | Hemoglobin subunit beta                      | 53.58  | 0.52  | 0.11 |
| P02070                     | Complement component C9                      | 15.95  | 0.51  | 0.02 |

| NH <sub>2</sub> -AMS-6S T <sub>30</sub> |               |       |       |      |
|-----------------------------------------|---------------|-------|-------|------|
| Accession Number                        | Entry name    | Mass  | %RPA  | SD   |
| P02769                                  | Serum albumin | 69.32 | 25.68 | 0.83 |
| P00735                                  | Prothrombin   | 70.51 | 12.77 | 0.55 |

|            |                                              |        |       |      |
|------------|----------------------------------------------|--------|-------|------|
| Q7SIH1     | Alpha-2-macroglobulin                        | 167.58 | 10.95 | 0.86 |
| A0A140T881 | Apolipoprotein E                             | 36.04  | 9.83  | 0.23 |
| Q2UVX4     | Complement C3                                | 187.25 | 6.05  | 0.41 |
| F1N3Q7     | Apolipoprotein A-IV                          | 42.99  | 5.59  | 0.29 |
| F1MMD7     | Inter-alpha-trypsin inhibitor heavy chain H4 | 101.53 | 2.35  | 0.24 |
| F1MSZ6     | Antithrombin-III                             | 52.44  | 2.14  | 0.05 |
| Q3ZBS7     | Vitronectin                                  | 53.58  | 2.12  | 0.55 |
| G3X6K8     | Haptoglobin                                  | 44.87  | 2.06  | 0.09 |
| F1MMK9     | Protein AMBP                                 | 39.29  | 1.88  | 0.38 |
| P15497     | Apolipoprotein A-I                           | 30.28  | 1.88  | 0.09 |
| F1MNV4     | Inter-alpha-trypsin inhibitor heavy chain H2 | 106.16 | 1.62  | 0.06 |
| Q29443     | Transferrin                                  | 77.75  | 1.60  | 0.05 |
| F1MMP5     | Inter-alpha-trypsin inhibitor heavy chain H1 | 101.24 | 1.49  | 0.10 |
| F1MKS5     | Histidine-rich glycoprotein                  | 60.74  | 1.20  | 0.02 |
| Q2KJF1     | Alpha-1B-glycoprotein                        | 53.55  | 0.99  | 0.05 |
| Q3SYR8     | Immunoglobulin J chain                       | 17.86  | 0.97  | 0.09 |
| A0A140T8C8 | Kininogen-1                                  | 68.97  | 0.91  | 0.03 |
| Q28085     | Complement factor H                          | 140.37 | 0.83  | 0.02 |
| Q3SZV7     | Hemopexin                                    | 52.21  | 0.71  | 0.08 |
| Q3MHN2     | Complement component C9                      | 62.00  | 0.42  | 0.05 |
| P81947     | Tubulin alpha-1B chain                       | 50.15  | 0.41  | 0.01 |
| F1N6W9     | Collagen type XVIII alpha 1 chain            | 153.88 | 0.41  | 0.04 |
| F1N076     | Ceruloplasmin                                | 123.81 | 0.35  | 0.03 |
| P00745     | Vitamin K-dependent protein C                | 51.41  | 0.35  | 0.03 |
| G5E5K5     | Serglycin                                    | 16.49  | 0.34  | 0.11 |
| F1MD73     | Uncharacterized protein                      | 190.10 | 0.33  | 0.00 |
| P80012     | von Willebrand factor (vWF) (Fragment)       | 102.60 | 0.28  | 0.01 |
| F1MYN5     | Fibulin-1                                    | 77.49  | 0.27  | 0.02 |

| <b>NH<sub>2</sub>-AMS-6ST<sub>60</sub></b> |                                              |             |             |           |
|--------------------------------------------|----------------------------------------------|-------------|-------------|-----------|
| <b>Accession Number</b>                    | <b>Entry name</b>                            | <b>Mass</b> | <b>%RPA</b> | <b>SD</b> |
| P02769                                     | Serum albumin                                | 69.32       | 31.77       | 0.45      |
| P00735                                     | Prothrombin                                  | 70.51       | 26.99       | 0.38      |
| A0A140T881                                 | Apolipoprotein E                             | 36.04       | 8.11        | 0.25      |
| Q7SIH1                                     | Alpha-2-macroglobulin                        | 167.58      | 4.69        | 0.50      |
| Q3ZBS7                                     | Vitronectin                                  | 53.58       | 4.15        | 0.53      |
| Q2UVX4                                     | Complement C3                                | 187.25      | 3.90        | 0.26      |
| F1N3Q7                                     | Apolipoprotein A-IV                          | 42.99       | 3.54        | 0.17      |
| F1MMK9                                     | Protein AMBP                                 | 39.29       | 2.51        | 0.26      |
| F1MSZ6                                     | Antithrombin-III                             | 52.44       | 2.26        | 0.22      |
| F1MNV4                                     | Inter-alpha-trypsin inhibitor heavy chain H2 | 106.16      | 1.90        | 0.10      |

## Electronic Supporting Information

|        |                                              |        |      |      |
|--------|----------------------------------------------|--------|------|------|
| F1MMP5 | Inter-alpha-trypsin inhibitor heavy chain H1 | 101.24 | 1.37 | 0.07 |
| Q29443 | Transferrin                                  | 77.75  | 1.34 | 0.05 |
| Q2KJF1 | Alpha-1B-glycoprotein                        | 53.55  | 1.11 | 0.18 |
| P15497 | Apolipoprotein A-I                           | 30.28  | 1.10 | 0.06 |
| F1MMD7 | Inter-alpha-trypsin inhibitor heavy chain H4 | 101.53 | 0.99 | 0.10 |
| Q3SZV7 | Hemopexin                                    | 52.21  | 0.63 | 0.46 |
| P00741 | Coagulation factor IX                        | 52.05  | 0.62 | 0.05 |
| P81947 | Tubulin alpha-1B chain                       | 50.15  | 0.41 | 0.05 |
| P00744 | Vitamin K-dependent protein Z                | 43.11  | 0.41 | 0.09 |
| Q3SYW7 | SPARC like 1                                 | 74.93  | 0.29 | 0.01 |
| F1N3A1 | Thrombospondin-1                             | 129.39 | 0.27 | 0.38 |
| F1N6W9 | Collagen type XVIII alpha 1 chain            | 153.88 | 0.21 | 0.09 |
| P00745 | Vitamin K-dependent protein C                | 51.41  | 0.18 | 0.26 |
| P81948 | Tubulin alpha-4A chain                       | 49.92  | 0.18 | 0.13 |
| F1MKS5 | Histidine-rich glycoprotein                  | 60.74  | 0.16 | 0.18 |
| A6QPP2 | SERPIND1 protein                             | 55.21  | 0.16 | 0.11 |
| G5E513 | Uncharacterized protein                      | 49.97  | 0.11 | 0.08 |
| P80012 | von Willebrand factor                        | 102.60 | 0.10 | 0.10 |
| E1BNI8 | 5'-nucleotidase domain containing 2          | 64.32  | 0.09 | 0.13 |
| A5PJ69 | SERPINA10 protein                            | 51.99  | 0.09 | 0.13 |

| <b>NH<sub>2</sub>-AMS-6ST<sub>120</sub></b> |                                              |             |             |           |
|---------------------------------------------|----------------------------------------------|-------------|-------------|-----------|
| <b>Accession Number</b>                     | <b>Entry name</b>                            | <b>Mass</b> | <b>%RPA</b> | <b>SD</b> |
| P02769                                      | Serum albumin                                | 69.32       | 45.22       | 1.36      |
| P00735                                      | Prothrombin                                  | 70.51       | 24.54       | 1.92      |
| A0A140T881                                  | Apolipoprotein E                             | 36.04       | 6.84        | 0.90      |
| Q3ZBS7                                      | Vitronectin                                  | 53.58       | 4.11        | 0.29      |
| Q7SIH1                                      | Alpha-2-macroglobulin                        | 167.58      | 2.56        | 1.95      |
| F1N3Q7                                      | Apolipoprotein A-IV                          | 42.99       | 2.23        | 0.09      |
| F1MNMW4                                     | Inter-alpha-trypsin inhibitor heavy chain H2 | 106.16      | 1.68        | 0.17      |
| Q29443                                      | Transferrin                                  | 77.75       | 1.64        | 0.18      |
| F1MMP5                                      | Inter-alpha-trypsin inhibitor heavy chain H1 | 101.24      | 1.58        | 0.11      |
| F1MMD7                                      | Inter-alpha-trypsin inhibitor heavy chain H4 | 101.53      | 1.47        | 0.53      |
| P15497                                      | Apolipoprotein A-I                           | 30.28       | 1.45        | 0.18      |
| Q2UVX4                                      | Complement C3                                | 187.25      | 1.25        | 0.16      |
| F1N3A1                                      | Thrombospondin-1                             | 129.39      | 0.91        | 1.29      |
| F1MMK9                                      | Protein AMBP                                 | 39.29       | 0.91        | 1.29      |
| G3NOV0                                      | Uncharacterized protein                      | 35.95       | 0.81        | 0.32      |
| Q3SYW7                                      | SPARC like 1                                 | 74.93       | 0.55        | 0.03      |
| F1MSZ6                                      | Antithrombin-III                             | 52.44       | 0.43        | 0.60      |
| G5E5T5                                      | Uncharacterized protein                      | 42.47       | 0.34        | 0.24      |
| P81947                                      | Tubulin alpha-1B chain                       | 50.15       | 0.25        | 0.18      |
| F1N6W9                                      | Collagen type XVIII alpha 1 chain            | 153.88      | 0.24        | 0.07      |



|            |                                                |        |      |      |
|------------|------------------------------------------------|--------|------|------|
| F1MD73     | Uncharacterized protein                        | 190.10 | 0.22 | 0.17 |
| E1BH06     | Uncharacterized protein                        | 192.77 | 0.15 | 0.21 |
| Q3SZV7     | Hemopexin                                      | 52.21  | 0.14 | 0.20 |
| P80012     | von Willebrand factor                          | 102.60 | 0.14 | 0.10 |
| Q5KR47-2   | Tropomyosin alpha-3 chain                      | 32.82  | 0.09 | 0.13 |
| G5E513     | Uncharacterized protein                        | 49.97  | 0.09 | 0.06 |
| Q2KJF1     | Alpha-1B-glycoprotein (Alpha-1-B glycoprotein) | 53.55  | 0.08 | 0.12 |
| A0A140T8C8 | Kininogen-1                                    | 68.97  | 0.06 | 0.08 |

| <b>AS-AMS-6FT<sub>10</sub></b> |                                              |             |             |           |
|--------------------------------|----------------------------------------------|-------------|-------------|-----------|
| <b>Accession Number</b>        | <b>Entry name</b>                            | <b>Mass</b> | <b>%RPA</b> | <b>SD</b> |
| P15497                         | Apolipoprotein A-I                           | 30.28       | 61.43       | 4.11      |
| A0A140T897                     | Serum albumin                                | 69.32       | 10.79       | 0.26      |
| Q2UVX4                         | Complement C3                                | 187.25      | 5.08        | 0.06      |
| P00735                         | Prothrombin                                  | 70.51       | 3.59        | 0.66      |
| F1N3Q7                         | Apolipoprotein A4                            | 52.29       | 2.60        | 0.21      |
| Q7SIH1                         | Alpha-2-macroglobulin (Alpha-2-M)            | 167.58      | 2.51        | 0.31      |
| P35541                         | Serum amyloid A protein (SAA)                | 12.15       | 2.04        | 0.18      |
| Q29443                         | Serotransferrin (Transferrin)                | 77.75       | 1.53        | 0.06      |
| A6QNZ7                         | Keratin 10                                   | 54.85       | 1.47        | 0.08      |
| A0A140T881                     | Apolipoprotein E                             | 37.42       | 1.35        | 0.22      |
| F1MMD7                         | Inter-alpha-trypsin inhibitor heavy chain H4 | 101.51      | 1.24        | 0.35      |
| Q3ZBS7                         | Vitronectin                                  | 35.95       | 0.94        | 0.09      |
| F1MSZ6                         | Serpin family C member 1                     | 48.86       | 0.83        | 0.10      |
| P19035                         | Apolipoprotein C-III                         | 26.66       | 0.57        | 0.06      |
| Q148H7                         | Keratin                                      | 57.72       | 0.56        | 0.03      |
| G8JKW7                         | Serpin A3-7                                  | 46.58       | 0.53        | 0.10      |
| P01966                         | Hemoglobin subunit alpha                     | 15.18       | 0.41        | 0.07      |
| P02070                         | Hemoglobin subunit beta                      | 192.80      | 0.29        | 0.09      |
| F1N514                         | CD5L protein                                 | 50.21       | 0.27        | 0.03      |
| Q2KJF1                         | Alpha-1B-glycoprotein                        | 53.55       | 0.25        | 0.03      |
| P00741                         | Coagulation factor IX                        | 14.64       | 0.21        | 0.01      |
| P81644                         | Apolipoprotein A-II                          | 11.20       | 0.21        | 0.04      |
| G3X6K8                         | Haptoglobin                                  | 41.98       | 0.20        | 0.05      |
| Q5E9B1                         | L-lactate dehydrogenase B chain              | 14.38       | 0.17        | 0.02      |
| E1BIK4                         | C-X-C motif chemokine                        | 21.49       | 0.12        | 0.17      |
| Q5GN72                         | Alpha-1-acid glycoprotein                    | 23.16       | 0.12        | 0.02      |
| Q3SZV7                         | Hemopexin                                    | 52.21       | 0.09        | 0.12      |
| A5PJE3                         | Fibrinogen alpha chain                       | 67.00       | 0.08        | 0.06      |
| F1MRD0                         | Actin                                        | 41.85       | 0.06        | 0.04      |
| P28800                         | Alpha-2-antiplasmin                          | 54.71       | 0.05        | 0.07      |

| CAL-AMS-6FT <sub>10</sub> |                                              |        |       |      |
|---------------------------|----------------------------------------------|--------|-------|------|
| Accession Number          | Entry name                                   | Mass   | %RPA  | SD   |
| P15497                    | Apolipoprotein A-I                           | 30.28  | 16.51 | 0.59 |
| F1MMD7                    | Inter-alpha-trypsin inhibitor heavy chain H4 | 101.51 | 15.58 | 0.37 |
| Q2UVX4                    | Complement C3                                | 187.25 | 12.09 | 0.74 |
| AOA140T897                | Serum albumin                                | 69.32  | 11.29 | 0.76 |
| F1N116                    | Gelsolin                                     | 92.08  | 8.32  | 0.51 |
| Q7SIH1                    | Alpha-2-macroglobulin                        | 167.58 | 3.93  | 0.16 |
| F1N3Q7                    | Apolipoprotein A4                            | 52.29  | 3.89  | 0.27 |
| AOA140T881                | Apolipoprotein E                             | 37.42  | 2.18  | 0.04 |
| A6QNZ7                    | Keratin 10                                   | 54.85  | 1.92  | 0.07 |
| P35541                    | Serum amyloid A protein                      | 14.52  | 1.92  | 0.27 |
| P81644                    | Apolipoprotein A-II                          | 11.20  | 1.77  | 0.59 |
| Q29443                    | Transferrin                                  | 77.75  | 1.41  | 0.10 |
| A5PJE3                    | Fibrinogen alpha chain                       | 67.00  | 1.20  | 0.18 |
| P12763                    | Alpha-2-HS-glycoprotein                      | 38.42  | 1.17  | 0.10 |
| F1N3A1                    | Thrombospondin-1                             | 129.39 | 1.10  | 0.07 |
| F1MSZ6                    | Serpin family C member 1                     | 48.86  | 1.06  | 0.06 |
| P00735                    | Prothrombin                                  | 70.51  | 1.06  | 0.04 |
| F1N0I3                    | Coagulation factor V                         | 239.55 | 1.00  | 0.22 |
| Q148H7                    | Cytokeratin-79                               | 57.72  | 0.90  | 0.01 |
| AOA140T8C8                | Kininogen-1                                  | 68.97  | 0.89  | 0.21 |
| Q8SPP7                    | Peptidoglycan recognition protein 1          | 21.06  | 0.79  | 0.23 |
| P19035                    | Apolipoprotein C-III                         | 10.69  | 0.73  | 0.09 |
| Q3SZV7                    | Hemopexin                                    | 52.21  | 0.71  | 0.04 |
| E1BIK4                    | C-X-C motif chemokine                        | 12.60  | 0.68  | 0.09 |
| Q2KIS7                    | Tetranectin                                  | 22.14  | 0.62  | 0.01 |
| Q2KIU3                    | Protein HP-25 homolog 2                      | 22.91  | 0.53  | 0.08 |
| P02070                    | Hemoglobin subunit beta                      | 15.95  | 0.50  | 0.03 |
| A5PJT7                    | ECM1 protein                                 | 57.64  | 0.43  | 0.32 |
| Q28085                    | Complement factor H                          | 140.37 | 0.36  | 0.04 |
| P19660                    | Cathelicidin-2                               | 20.03  | 0.35  | 0.03 |

| CAL-AMS-6FT <sub>30</sub> |                                              |        |       |      |
|---------------------------|----------------------------------------------|--------|-------|------|
| Accession Number          | Entry name                                   | Mass   | %RPA  | SD   |
| P02769                    | ALBU_BOVIN                                   | 69.32  | 11.29 | 3.18 |
| Q7SIH1                    | Alpha-2-macroglobulin                        | 167.57 | 10.01 | 1.73 |
| P15497                    | Apolipoprotein A-I                           | 30.28  | 8.78  | 0.85 |
| Q2UVX4                    | Complement factor H                          | 187.25 | 8.53  | 0.90 |
| F1N116                    | Gelsolin                                     | 85.69  | 7.32  | 0.62 |
| F1MMD7                    | Inter-alpha-trypsin inhibitor heavy chain H4 | 101.53 | 6.97  | 1.03 |
| Q28085                    | Complement factor H                          | 140.37 | 4.59  | 0.35 |
| G3MYU2                    | Keratin 77                                   | 66.02  | 3.61  | 0.56 |

|            |                                                  |        |      |      |
|------------|--------------------------------------------------|--------|------|------|
| F1N3A1     | Thrombospondin-1                                 | 129.39 | 3.23 | 0.34 |
| AOA140T881 | Apolipoprotein E                                 | 36.04  | 3.10 | 0.59 |
| G5E604     | Ig-like domain-containing protein                | 11.06  | 2.78 | 0.83 |
| F1N3Q7     | Apolipoprotein A-IV                              | 42.99  | 2.35 | 0.62 |
| F1MSZ6     | Antithrombin-III                                 | 52.44  | 1.38 | 0.39 |
| A6QNZ7     | Keratin 10                                       | 59.51  | 1.33 | 0.31 |
| P00735     | Prothrombin                                      | 70.51  | 1.28 | 0.36 |
| Q8SPP7     | Peptidoglycan recognition protein 1              | 21.06  | 1.25 | 0.17 |
| Q3SZV7     | Hemopexin                                        | 52.21  | 1.09 | 0.06 |
| B8Y9S9     | Embryo-specific fibronectin 1 transcript variant | 262.42 | 1.05 | 0.33 |
| A5PJT7     | ECM1 protein                                     | 57.64  | 1.03 | 0.05 |
| F1MLW7     | Tetranectin                                      | 24.40  | 1.02 | 0.10 |
| Q2KIS7     | L-lactate dehydrogenase B chain                  | 22.14  | 0.93 | 0.06 |
| Q5E9B1     | Fibrinogen alpha chain                           | 36.72  | 0.84 | 0.02 |
| A5PJE3     | Vitronectin                                      | 67.00  | 0.83 | 0.03 |
| Q3ZBS7     | MYO1B protein                                    | 53.58  | 0.72 | 0.09 |
| A6QLD6     | IF rod domain-containing protein                 | 131.83 | 0.71 | 0.53 |
| E1B991     | Immunoglobulin J chain                           | 65.87  | 0.68 | 0.15 |
| Q3SYR8     | Plasminogen                                      | 17.86  | 0.67 | 0.01 |
| F1MW79     | Keratin 18                                       | 30.88  | 0.58 | 0.06 |
| F6S1Q0     | Serum amyloid A protein                          | 47.96  | 0.54 | 0.39 |
| E1BJF9     | Ig-like domain-containing protein                | 14.60  | 0.54 | 0.17 |

| <b>CAL-AMS-6FT<sub>60</sub></b> |                                              |             |             |           |
|---------------------------------|----------------------------------------------|-------------|-------------|-----------|
| <b>Accession Number</b>         | <b>Entry name</b>                            | <b>Mass</b> | <b>%RPA</b> | <b>SD</b> |
| P02769                          | Serum albumin                                | 69.32       | 13.02       | 1.07      |
| Q7SIH1                          | Alpha-2-macroglobulin                        | 167.57      | 10.11       | 1.57      |
| F1MMD7                          | Inter-alpha-trypsin inhibitor heavy chain H4 | 101.53      | 8.18        | 3.77      |
| Q2UVX4                          | Complement C3                                | 187.25      | 7.90        | 1.52      |
| F1N1I6                          | Gelsolin                                     | 85.69       | 7.05        | 1.67      |
| P15497                          | Apolipoprotein A-I                           | 30.28       | 5.93        | 0.62      |
| G3MYU2                          | Keratin 77                                   | 66.02       | 5.05        | 2.04      |
| Q28085                          | Complement factor H (H factor 1)             | 140.37      | 4.38        | 1.38      |
| F1N3Q7                          | Apolipoprotein A-IV                          | 42.99       | 2.77        | 0.38      |
| AOA140T881                      | Apolipoprotein E                             | 36.04       | 2.58        | 0.56      |
| G5E604                          | Ig-like domain-containing protein            | 11.06       | 2.57        | 0.51      |
| A6QNZ7                          | Keratin 10                                   | 59.51       | 1.80        | 0.71      |
| Q3SZV7                          | Hemopexin                                    | 52.21       | 1.75        | 0.14      |
| F1MSZ6                          | Antithrombin-III                             | 52.44       | 1.64        | 0.51      |
| Q5E9B1                          | L-lactate dehydrogenase B chain              | 36.72       | 1.49        | 0.42      |
| F1N3A1                          | Thrombospondin-1                             | 129.39      | 1.48        | 0.39      |
| A5PJE3                          | Fibrinogen alpha chain                       | 67.00       | 1.06        | 0.18      |
| Q8SPP7                          | Peptidoglycan recognition protein 1          | 21.06       | 1.06        | 0.58      |

## Electronic Supporting Information

|        |                                                  |        |      |      |
|--------|--------------------------------------------------|--------|------|------|
| A5PJT7 | ECM1 protein                                     | 57.64  | 1.03 | 0.10 |
| P00735 | Prothrombin                                      | 70.51  | 1.01 | 0.50 |
| P06868 | Plasminogen                                      | 91.22  | 0.93 | 0.03 |
| E1B991 | IF rod domain-containing protein                 | 65.87  | 0.89 | 0.41 |
| Q2KJF1 | Alpha-1B-glycoprotein                            | 53.55  | 0.73 | 0.15 |
| Q29443 | Stransferrin                                     | 75.83  | 0.70 | 0.26 |
| Q3ZBS7 | Vitronectin                                      | 53.58  | 0.62 | 0.26 |
| Q3SYR8 | Immunoglobulin J chain                           | 17.86  | 0.61 | 0.08 |
| Q2KIT0 | Protein HP-20 homolog                            | 20.65  | 0.60 | 0.10 |
| B8Y9S9 | Embryo-specific fibronectin 1 transcript variant | 262.42 | 0.59 | 0.15 |
| E1BJF9 | Serum amyloid A protein                          | 14.60  | 0.58 | 0.11 |
| F6S1Q0 | Keratin 18                                       | 47.96  | 0.56 | 0.65 |

| <b>CAL-AMS-6FT<sub>120</sub></b> |                                                  |             |             |           |
|----------------------------------|--------------------------------------------------|-------------|-------------|-----------|
| <b>Accession Number</b>          | <b>Entry name</b>                                | <b>Mass</b> | <b>%RPA</b> | <b>SD</b> |
| P02769                           | Serum albumin                                    | 69.32       | 11.38       | 0.73      |
| Q7SIH1                           | Alpha-2-macroglobulin                            | 167.57      | 10.83       | 3.56      |
| P15497                           | Apolipoprotein A-I                               | 30.28       | 6.60        | 0.26      |
| F1N1I6                           | Gelsolin                                         | 85.69       | 5.48        | 0.41      |
| Q2UVX4                           | Complement C3                                    | 187.25      | 5.43        | 0.43      |
| G5E604                           | Ig-like domain-containing protein                | 11.06       | 4.94        | 0.29      |
| A0A140T881                       | Apolipoprotein E                                 | 36.04       | 4.89        | 0.64      |
| Q28085                           | Complement factor H (H factor 1)                 | 140.37      | 4.68        | 0.30      |
| F1N3Q7                           | Apolipoprotein A-IV                              | 42.99       | 4.44        | 0.60      |
| F1MMD7                           | Inter-alpha-trypsin inhibitor heavy chain H4     | 101.53      | 2.87        | 1.76      |
| F1MSZ6                           | Antithrombin-III                                 | 52.44       | 1.80        | 0.46      |
| A5PJE3                           | Fibrinogen alpha chain                           | 67.00       | 1.74        | 0.06      |
| Q3SZV7                           | Hemopexin                                        | 52.21       | 1.67        | 0.07      |
| F1MLW7                           | L-lactate dehydrogenase B chain                  | 24.40       | 1.58        | 0.09      |
| Q5E9B1                           | Embryo-specific fibronectin 1 transcript variant | 36.72       | 1.51        | 0.04      |
| B8Y9S9                           | Peptidoglycan recognition protein 1              | 262.42      | 1.34        | 0.22      |
| Q8SPP7                           | Keratin 10                                       | 21.06       | 1.20        | 0.05      |
| A6QNZ7                           | Vitronectin                                      | 59.51       | 1.12        | 0.17      |
| E1BJF9                           | Serum amyloid A protein                          | 14.60       | 1.09        | 0.08      |
| A5PJT7                           | ECM1 protein                                     | 57.64       | 1.05        | 0.37      |
| P06868                           | Plasminogen                                      | 91.22       | 0.92        | 0.01      |
| P13384                           | Insulin-like growth factor-binding protein 2     | 34.02       | 0.91        | 0.04      |
| F1N3A1                           | Thrombospondin-1                                 | 129.39      | 0.88        | 0.09      |
| P00735                           | Prothrombin                                      | 70.51       | 0.86        | 0.08      |
| Q3SYR8                           | Immunoglobulin J chain                           | 17.86       | 0.78        | 0.01      |
| E1B991                           | IF rod domain-containing protein                 | 65.87       | 0.70        | 0.16      |
| Q2KIT0                           | Protein HP-20 homolog                            | 20.65       | 0.62        | 0.07      |

## Electronic Supporting Information

|        |                                   |        |      |      |
|--------|-----------------------------------|--------|------|------|
| F1N076 | Ceruloplasmin                     | 123.81 | 0.60 | 0.06 |
| Q2KIS7 | Tetranectin                       | 22.14  | 0.59 | 0.06 |
| F1MCF8 | Ig-like domain-containing protein | 24.54  | 0.55 | 0.06 |

| <b>NH<sub>2</sub>-AMS-6FT<sub>30</sub></b> |                                              |             |             |           |
|--------------------------------------------|----------------------------------------------|-------------|-------------|-----------|
| <b>Accession Number</b>                    | <b>Entry name</b>                            | <b>Mass</b> | <b>%RPA</b> | <b>SD</b> |
| P00735                                     | Prothrombin                                  | 70.51       | 19.12       | 1.87      |
| A0A140T897                                 | Serum albumin                                | 69.32       | 13.30       | 0.29      |
| Q7SIH1                                     | Alpha-2-macroglobulin                        | 167.58      | 10.77       | 0.29      |
| Q2UVX4                                     | Complement C3                                | 187.25      | 9.05        | 0.31      |
| F1MMP5                                     | Inter-alpha-trypsin inhibitor heavy chain H1 | 101.24      | 6.70        | 0.23      |
| F1MNV4                                     | Inter-alpha-trypsin inhibitor heavy chain H2 | 106.16      | 6.32        | 0.14      |
| P15497                                     | Apolipoprotein A-I                           | 30.28       | 3.74        | 0.26      |
| F1MMK9                                     | Protein AMBP                                 | 39.29       | 3.62        | 0.14      |
| A0A140T881                                 | Apolipoprotein E                             | 36.04       | 3.33        | 0.08      |
| Q3ZBS7                                     | Vitronectin                                  | 53.58       | 2.26        | 0.07      |
| Q3Y5Z3                                     | Adiponectin                                  | 26.13       | 2.08        | 0.02      |
| F1N3Q7                                     | Apolipoprotein A-IV                          | 42.99       | 1.92        | 0.05      |
| E1BMJ0                                     | Serpin family G member 1                     | 51.71       | 1.63        | 0.07      |
| F1MSZ6                                     | Antithrombin-III                             | 52.44       | 1.56        | 0.05      |
| G3X6K8                                     | Haptoglobin                                  | 44.87       | 0.98        | 0.04      |
| F1MMD7                                     | Inter-alpha-trypsin inhibitor heavy chain H4 | 101.53      | 0.98        | 0.08      |
| Q29443                                     | Transferrin                                  | 77.75       | 0.68        | 0.03      |
| Q5GN72                                     | Alpha-1-acid glycoprotein                    | 23.16       | 0.63        | 0.01      |
| F1N076                                     | Ceruloplasmin                                | 123.81      | 0.63        | 0.02      |
| A0A140T8C8                                 | Kininogen-1                                  | 68.97       | 0.61        | 0.04      |
| B8Y9S9                                     | Fibronectin                                  | 262.43      | 0.55        | 0.01      |
| Q28107                                     | Coagulation factor V                         | 248.98      | 0.54        | 0.04      |
| P81187                                     | Complement factor B                          | 85.37       | 0.48        | 0.10      |
| A6QPP2                                     | SERPIND1 protein                             | 55.21       | 0.45        | 0.07      |
| Q2KJF1                                     | Alpha-1B-glycoprotein                        | 53.55       | 0.43        | 0.04      |
| G5E5K5                                     | Serglycin                                    | 16.49       | 0.38        | 0.04      |
| F1N3A1                                     | Thrombospondin-1                             | 129.39      | 0.37        | 0.03      |
| G3N0V2                                     | Keratin 1                                    | 63.15       | 0.35        | 0.01      |
| P56652                                     | Inter-alpha-trypsin inhibitor heavy chain H3 | 99.55       | 0.33        | 0.01      |
| F1MNN7                                     | Lipopolysaccharide-binding protein           | 53.70       | 0.31        | 0.03      |

| <b>NH<sub>2</sub>-AMS-6FT<sub>60</sub></b> |                       |             |             |           |
|--------------------------------------------|-----------------------|-------------|-------------|-----------|
| <b>Accession Number</b>                    | <b>Entry name</b>     | <b>Mass</b> | <b>%RPA</b> | <b>SD</b> |
| P00735                                     | Prothrombin           | 70.51       | 22.57       | 0.48      |
| A0A140T897                                 | Serum albumin         | 69.32       | 17.03       | 0.20      |
| Q7SIH1                                     | Alpha-2-macroglobulin | 167.58      | 9.08        | 0.31      |

## Electronic Supporting Information

|            |                                              |        |      |      |
|------------|----------------------------------------------|--------|------|------|
| P15497     | Apolipoprotein A-I                           | 30.28  | 6.41 | 0.89 |
| F1MMP5     | Inter-alpha-trypsin inhibitor heavy chain H1 | 101.24 | 6.31 | 0.39 |
| Q2UVX4     | Complement C3                                | 187.25 | 5.68 | 0.09 |
| F1MNV4     | Inter-alpha-trypsin inhibitor heavy chain H2 | 106.16 | 5.41 | 0.42 |
| F1MMK9     | Protein AMBP                                 | 39.29  | 4.05 | 0.12 |
| A0A140T881 | Apolipoprotein E                             | 36.04  | 2.87 | 0.03 |
| F1N3Q7     | Apolipoprotein A-IV                          | 42.99  | 2.18 | 0.10 |
| Q3ZBS7     | Vitronectin                                  | 53.58  | 1.54 | 0.08 |
| F1MMD7     | Inter-alpha-trypsin inhibitor heavy chain H4 | 101.53 | 1.48 | 0.22 |
| Q3Y5Z3     | Adiponectin                                  | 26.13  | 1.39 | 0.07 |
| F1MSZ6     | Antithrombin-III                             | 52.44  | 1.08 | 0.03 |
| Q29443     | Transferrin                                  | 77.75  | 1.05 | 0.10 |
| G3X6K8     | Haptoglobin                                  | 44.87  | 1.02 | 0.07 |
| E1BKZ0     | Pericentrin                                  | 327.24 | 0.80 | 1.14 |
| F1N3A1     | Thrombospondin-1                             | 129.39 | 0.65 | 0.04 |
| Q5GN72     | Alpha-1-acid glycoprotein                    | 23.16  | 0.54 | 0.04 |
| F1N076     | Ceruloplasmin                                | 123.81 | 0.52 | 0.02 |
| A0A140T8C8 | Kininogen-1                                  | 68.97  | 0.50 | 0.01 |
| B8Y9S9     | Fibronectin                                  | 262.43 | 0.50 | 0.01 |
| E1BMJ0     | Serpin family G member 1                     | 51.71  | 0.45 | 0.02 |
| P81187     | Complement factor B                          | 85.37  | 0.41 | 0.05 |
| P56652     | Inter-alpha-inhibitor heavy chain 3          | 99.55  | 0.40 | 0.01 |
| Q2KJF1     | Alpha-1B-glycoprotein                        | 53.55  | 0.38 | 0.01 |
| Q28107     | Coagulation factor V                         | 248.98 | 0.34 | 0.04 |
| G3N0V2     | Keratin 1                                    | 63.15  | 0.25 | 0.01 |
| P80012     | von Willebrand factor                        | 102.60 | 0.25 | 0.02 |
| P07224     | Vitamin K-dependent protein S                | 75.13  | 0.22 | 0.02 |

| <b>NH<sub>2</sub>-AMS-6FT<sub>120</sub></b> |                                              |             |             |           |
|---------------------------------------------|----------------------------------------------|-------------|-------------|-----------|
| <b>Accession Number</b>                     | <b>Entry name</b>                            | <b>Mass</b> | <b>%RPA</b> | <b>SD</b> |
| P00735                                      | Prothrombin                                  | 70.51       | 17.94       | 1.13      |
| A0A140T897                                  | Serum albumin                                | 69.32       | 16.48       | 0.42      |
| Q7SIH1                                      | Alpha-2-macroglobulin                        | 167.58      | 12.60       | 0.64      |
| F1MMP5                                      | Inter-alpha-trypsin inhibitor heavy chain H1 | 101.24      | 6.83        | 0.07      |
| F1MNV4                                      | Inter-alpha-trypsin inhibitor heavy chain H2 | 106.16      | 6.14        | 0.18      |
| Q2UVX4                                      | Complement C3                                | 187.25      | 5.40        | 0.18      |
| F1MMK9                                      | Protein AMBP                                 | 39.29       | 4.93        | 0.25      |
| A0A140T881                                  | Apolipoprotein E                             | 36.04       | 3.66        | 0.11      |
| P15497                                      | Apolipoprotein A-I                           | 30.28       | 3.36        | 0.20      |
| Q3ZBS7                                      | Vitronectin                                  | 53.58       | 2.61        | 0.09      |
| Q3Y5Z3                                      | Adiponectin                                  | 26.13       | 2.48        | 0.28      |
| F1N3Q7                                      | Apolipoprotein A-IV                          | 42.99       | 1.69        | 0.08      |
| E1BMJ0                                      | Serpin family G member 1                     | 51.71       | 1.44        | 0.03      |

|            |                                              |        |      |      |
|------------|----------------------------------------------|--------|------|------|
| F1MSZ6     | Antithrombin-III                             | 52.44  | 1.15 | 0.06 |
| F1MMD7     | Inter-alpha-trypsin inhibitor heavy chain H4 | 101.53 | 0.97 | 0.12 |
| Q29443     | Transferrin                                  | 77.75  | 0.97 | 0.04 |
| G3X6K8     | Haptoglobin                                  | 44.87  | 0.87 | 0.04 |
| F1N076     | Ceruloplasmin                                | 123.81 | 0.71 | 0.03 |
| B8Y9S9     | Fibronectin                                  | 262.43 | 0.64 | 0.05 |
| Q5GN72     | Alpha-1-acid glycoprotein                    | 23.16  | 0.61 | 0.17 |
| A0A140T8C8 | Kininogen-1                                  | 68.97  | 0.54 | 0.03 |
| P81187     | Complement factor B                          | 85.37  | 0.49 | 0.07 |
| F1N3A1     | Thrombospondin-1                             | 129.39 | 0.47 | 0.01 |
| P56652     | Inter-alpha-inhibitor heavy chain 3          | 99.55  | 0.46 | 0.01 |
| Q28107     | Coagulation factor V                         | 248.98 | 0.45 | 0.05 |
| Q2KJF1     | Alpha-1B-glycoprotein                        | 53.55  | 0.42 | 0.03 |
| Q3SZV7     | Hemopexin                                    | 52.21  | 0.32 | 0.06 |
| A6QPP2     | SERPIND1 protein                             | 55.21  | 0.26 | 0.02 |
| G3NOV2     | Keratin 1                                    | 63.15  | 0.26 | 0.04 |
| P07224     | Vitamin K-dependent protein S                | 75.13  | 0.24 | 0.01 |

| AS-SBA-15T <sub>10</sub> |                         |        |       |       |
|--------------------------|-------------------------|--------|-------|-------|
| Accession Number         | Entry name              | Mass   | %RPA  | SD    |
| G5E604                   | Uncharacterized protein | 12.94  | 33.68 | 10.09 |
| P01045                   | Kininogen-2             | 68.71  | 31.02 | 5.70  |
| P35541                   | Serum amyloid A         | 14.52  | 15.14 | 3.10  |
| P15497                   | Apolipoprotein A-I      | 30.28  | 7.75  | 5.55  |
| P35541                   | Apolipoprotein C-III    | 30.28  | 3.68  | 1.34  |
| Q3SYR8                   | Immunoglobulin J chain  | 17.86  | 3.25  | 0.50  |
| Q2UVX4                   | Complement C3           | 187.25 | 2.16  | 3.05  |
| A0A140T897               | Serum albumin           | 69.32  | 1.36  | 1.09  |
| Q7SIH1                   | Alpha-2-macroglobulin   | 167.58 | 0.93  | 1.32  |
| G5E5T5                   | Uncharacterized protein | 56.04  | 0.54  | 0.38  |
| A6QNZ7                   | Keratin 10              | 54.85  | 0.50  | 0.70  |

| CAL-SBA-15T <sub>10</sub> |                                   |        |       |      |
|---------------------------|-----------------------------------|--------|-------|------|
| Accession Number          | Entry name                        | Mass   | %RPA  | SD   |
| P15497                    | Apolipoprotein A-I                | 30.28  | 14.59 | 0.30 |
| G5E604                    | Ig-like domain-containing protein | 12.94  | 12.53 | 0.29 |
| A0A140T897                | Serum albumin                     | 69.32  | 9.92  | 0.08 |
| F1N1I6                    | Gelsolin                          | 92.08  | 9.84  | 0.95 |
| Q2UVX4                    | Complement C3                     | 187.25 | 9.43  | 1.64 |
| P35541                    | Serum amyloid A                   | 14.52  | 8.79  | 0.39 |
| Q7SIH1                    | Alpha-2-macroglobulin             | 167.58 | 4.32  | 0.34 |

|            |                                              |        |      |      |
|------------|----------------------------------------------|--------|------|------|
| F1MMD7     | Inter-alpha-trypsin inhibitor heavy chain H4 | 101.51 | 3.00 | 0.54 |
| A0A140T881 | Apolipoprotein E                             | 37.42  | 2.95 | 0.34 |
| A0A140T8C8 | Kininogen-1                                  | 68.97  | 2.57 | 0.22 |
| G3N2D7     | Ig-like domain-containing protein            | 12.15  | 2.21 | 0.21 |
| P19035     | Apolipoprotein C-III                         | 10.69  | 2.16 | 0.18 |
| F1N3A1     | Thrombospondin-1                             | 129.39 | 2.01 | 0.38 |
| E1BIK4     | C-X-C motif chemokine                        | 12.60  | 1.42 | 1.07 |
| Q29443     | Transferrin                                  | 77.75  | 1.29 | 0.19 |
| Q8SPP7     | Oligosaccharide-binding protein              | 21.06  | 1.27 | 0.43 |
| A5PJE3     | Fibrinogen alpha chain                       | 67.00  | 1.27 | 0.20 |
| P02070     | Hemoglobin subunit beta                      | 15.95  | 0.92 | 0.09 |
| F1MSZ6     | Antithrombin-III                             | 48.86  | 0.76 | 0.57 |
| P81644     | Apolipoprotein A-II                          | 11.20  | 0.64 | 0.29 |
| P00735     | Prothrombin                                  | 70.51  | 0.57 | 0.40 |
| P19034     | Apolipoprotein C-II                          | 11.06  | 0.51 | 0.62 |
| P82943     | Regakine-1                                   | 10.28  | 0.51 | 0.03 |
| Q2KJF1     | Alpha-1B-glycoprotein                        | 53.55  | 0.51 | 0.05 |
| Q3SYR8     | Immunoglobulin J chain                       | 17.86  | 0.50 | 0.05 |
| F1N0I3     | Coagulation factor V                         | 239.55 | 0.48 | 0.35 |
| Q2KIS7     | Tetranectin                                  | 22.14  | 0.47 | 0.34 |
| A6QNZ7     | Keratin 10                                   | 54.85  | 0.47 | 0.14 |
| P01035     | Cystatin-C                                   | 16.27  | 0.42 | 0.30 |
| Q5E9F5     | Transgelin-2                                 | 22.43  | 0.37 | 0.13 |

| CAL-SBA-15T <sub>30</sub> |                                               |        |       |      |
|---------------------------|-----------------------------------------------|--------|-------|------|
| Accession Number          | Entry name                                    | Mass   | %RPA  | SD   |
| F1MMD7                    | Inter-alpha-trypsin inhibitor heavy chain H4  | 101.53 | 16.52 | 0.51 |
| Q7SIH1                    | Alpha-2-macroglobulin                         | 167.58 | 12.33 | 0.60 |
| F1N1I6                    | Gelsolin                                      | 85.69  | 10.60 | 0.73 |
| A0A140T881                | Apolipoprotein E                              | 36.04  | 10.02 | 0.49 |
| P01030                    | Complement C4                                 | 101.89 | 7.97  | 0.84 |
| A0A140T897                | Serum albumin                                 | 69.32  | 4.85  | 0.18 |
| Q28085                    | Complement factor H                           | 140.37 | 4.73  | 0.27 |
| F1MSZ6                    | Antithrombin-III                              | 52.44  | 3.63  | 0.17 |
| F1N3Q7                    | Apolipoprotein A-IV                           | 42.99  | 3.34  | 0.03 |
| Q2UVX4                    | Complement C3                                 | 187.25 | 2.85  | 0.15 |
| F1N3A1                    | Thrombospondin-1                              | 129.39 | 2.81  | 0.21 |
| Q8SPP7                    | Oligosaccharide-binding protein               | 21.06  | 2.63  | 0.13 |
| P15497                    | Apolipoprotein A-I                            | 30.28  | 2.15  | 0.24 |
| A5PJT7                    | ECM1 protein (Extracellular matrix protein 1) | 57.64  | 1.61  | 0.17 |
| Q3SZV7                    | Hemopexin                                     | 52.21  | 1.41  | 0.05 |
| Q3ZBS7                    | Vitronectin                                   | 53.58  | 0.93  | 0.04 |
| F1MKS5                    | Histidine-rich glycoprotein                   | 60.74  | 0.68  | 0.13 |



## Electronic Supporting Information

|        |                                              |        |      |      |
|--------|----------------------------------------------|--------|------|------|
| P00735 | Prothrombin                                  | 70.51  | 0.64 | 0.04 |
| P56425 | Cathelicidin-7                               | 18.85  | 0.63 | 0.02 |
| P13384 | Insulin-like growth factor-binding protein 2 | 34.02  | 0.56 | 0.02 |
| F1N6W9 | Collagen type XVIII alpha 1 chain            | 153.88 | 0.46 | 0.04 |
| A6QPP2 | SERPIND1 protein                             | 55.21  | 0.45 | 0.01 |
| Q58DP6 | Ribonuclease 4                               | 16.94  | 0.44 | 0.14 |
| F1MM32 | Sulfhydryl oxidase                           | 63.00  | 0.43 | 0.01 |
| Q2KJF1 | Alpha-1B-glycoprotein                        | 53.55  | 0.37 | 0.02 |
| G3X6K8 | Haptoglobin                                  | 44.87  | 0.32 | 0.04 |
| B8Y9S9 | Fibronectin                                  | 262.43 | 0.32 | 0.01 |
| G3MYM8 | Proteoglycan 4                               | 116.92 | 0.31 | 0.04 |
| F1MMP5 | Inter-alpha-trypsin inhibitor heavy chain H1 | 101.24 | 0.27 | 0.04 |
| F1MLW7 | Uncharacterized protein                      | 24.40  | 0.24 | 0.02 |

| CAL-SBA-15T <sub>60</sub> |                                              |        |       |      |
|---------------------------|----------------------------------------------|--------|-------|------|
| Accession Number          | Entry name                                   | Mass   | %RPA  | SD   |
| A0A140T897                | Serum albumin                                | 69.32  | 17.11 | 0.25 |
| F1MMD7                    | Inter-alpha-trypsin inhibitor heavy chain H4 | 101.53 | 14.80 | 0.65 |
| Q7SIH1                    | Alpha-2-macroglobulin                        | 167.58 | 12.33 | 0.20 |
| P01030                    | Complement C4                                | 101.89 | 11.09 | 0.87 |
| F1N1I6                    | Gelsolin                                     | 85.69  | 7.07  | 0.55 |
| P15497                    | Apolipoprotein A-I                           | 30.28  | 5.16  | 0.34 |
| Q2UVX4                    | Complement C3                                | 187.25 | 3.54  | 0.12 |
| Q28085                    | Complement factor H                          | 140.37 | 3.53  | 0.22 |
| A0A140T881                | Apolipoprotein E                             | 36.04  | 3.36  | 0.07 |
| Q2KJF1                    | Alpha-1B-glycoprotein                        | 53.55  | 1.58  | 0.04 |
| F1MSZ6                    | Antithrombin-III                             | 52.44  | 1.54  | 0.11 |
| F1N3A1                    | Thrombospondin-1                             | 129.39 | 1.52  | 0.09 |
| A5PJT7                    | ECM1 protein                                 | 57.64  | 1.42  | 0.08 |
| Q3SZV7                    | Hemopexin                                    | 52.21  | 1.41  | 0.11 |
| F1N3Q7                    | Apolipoprotein A-IV                          | 42.99  | 1.36  | 0.18 |
| G3X6K8                    | Haptoglobin                                  | 44.87  | 1.32  | 0.05 |
| Q8SPP7                    | Oligosaccharide-binding protein              | 21.06  | 1.14  | 0.27 |
| Q29443                    | Transferrin                                  | 77.75  | 0.62  | 0.03 |
| Q3ZBS7                    | Vitronectin                                  | 53.58  | 0.61  | 0.10 |
| Q5GN72                    | Alpha-1-acid glycoprotein                    | 23.16  | 0.53  | 0.07 |
| P02070                    | Hemoglobin subunit beta                      | 15.95  | 0.45  | 0.04 |
| Q58DP6                    | Ribonuclease 4                               | 16.94  | 0.44  | 0.08 |
| P00735                    | Prothrombin                                  | 70.51  | 0.43  | 0.03 |
| Q3MHN2                    | Complement component C9                      | 62.00  | 0.42  | 0.03 |
| F1MMP5                    | Inter-alpha-trypsin inhibitor heavy chain H1 | 101.24 | 0.36  | 0.03 |
| P56425                    | Cathelicidin-7                               | 18.85  | 0.35  | 0.03 |
| P81187                    | Complement factor B                          | 85.37  | 0.34  | 0.01 |

|            |                       |       |      |      |
|------------|-----------------------|-------|------|------|
| E1B726     | Plasminogen           | 91.24 | 0.31 | 0.04 |
| Q2KIT0     | Protein HP-20 homolog | 20.65 | 0.30 | 0.04 |
| A0A140T843 | Beta-2-glycoprotein 1 | 38.25 | 0.30 | 0.01 |

| CAL-SBA-15T <sub>120</sub> |                                              |        |       |      |
|----------------------------|----------------------------------------------|--------|-------|------|
| Accession Number           | Entry name                                   | Mass   | %RPA  | SD   |
| A0A140T897                 | Serum albumin                                | 69.32  | 24.15 | 0.76 |
| F1MMD7                     | Inter-alpha-trypsin inhibitor heavy chain H4 | 101.53 | 16.67 | 0.63 |
| F1N1I6                     | Gelsolin                                     | 85.69  | 11.29 | 0.47 |
| P01030                     | Complement C4                                | 101.89 | 10.93 | 2.26 |
| Q7SIH1                     | Alpha-2-macroglobulin                        | 167.58 | 5.13  | 0.24 |
| Q28085                     | Complement factor H                          | 140.37 | 3.90  | 0.18 |
| Q2UVX4                     | Complement C3                                | 187.25 | 3.64  | 0.19 |
| P15497                     | Apolipoprotein A-I                           | 30.28  | 3.25  | 0.51 |
| A0A140T881                 | Apolipoprotein E                             | 36.04  | 2.34  | 0.37 |
| A5PJT7                     | ECM1 protein                                 | 57.64  | 1.81  | 0.05 |
| F1N3A1                     | Thrombospondin-1                             | 129.39 | 1.67  | 0.17 |
| F1N3Q7                     | Apolipoprotein A-IV                          | 42.99  | 1.56  | 0.08 |
| Q3SZV7                     | Hemopexin                                    | 52.21  | 1.51  | 0.13 |
| Q8SPP7                     | Oligosaccharide-binding protein              | 21.06  | 1.48  | 0.19 |
| F1MSZ6                     | Antithrombin-III                             | 52.44  | 1.19  | 0.11 |
| Q3ZBS7                     | Vitronectin                                  | 53.58  | 0.79  | 0.00 |
| Q58DP6                     | Ribonuclease 4                               | 16.94  | 0.70  | 0.05 |
| Q2KJF1                     | Alpha-1B-glycoprotein                        | 53.55  | 0.68  | 0.05 |
| Q29443                     | Transferrin                                  | 77.75  | 0.67  | 0.12 |
| P56425                     | Cathelicidin-7                               | 18.85  | 0.50  | 0.05 |
| Q3MHN2                     | Complement component C9                      | 62.00  | 0.47  | 0.06 |
| Q3SYR8                     | Immunoglobulin J chain                       | 17.86  | 0.34  | 0.01 |
| G3X6K8                     | Haptoglobin                                  | 44.87  | 0.33  | 0.01 |
| F1MMK9                     | Protein AMBP                                 | 39.29  | 0.28  | 0.03 |
| A0A140T843                 | Beta-2-glycoprotein 1                        | 38.25  | 0.25  | 0.03 |
| F1MMP5                     | Inter-alpha-trypsin inhibitor heavy chain H1 | 101.24 | 0.24  | 0.01 |
| P81187                     | Complement factor B                          | 85.37  | 0.24  | 0.01 |
| A6QPP2                     | SERPIND1 protein                             | 55.21  | 0.24  | 0.02 |
| G8JKW7                     | Uncharacterized protein                      | 46.34  | 0.21  | 0.02 |
| P13384                     | Insulin-like growth factor-binding protein 2 | 34.02  | 0.21  | 0.07 |

| NH <sub>2</sub> -SBA-15T <sub>30</sub> |                       |        |       |      |
|----------------------------------------|-----------------------|--------|-------|------|
| Accession Number                       | Entry name            | Mass   | %RPA  | SD   |
| A0A140T897                             | Serum albumin         | 69.32  | 26.62 | 0.44 |
| F1N1I6                                 | Gelsolin              | 85.69  | 11.49 | 0.82 |
| Q7SIH1                                 | Alpha-2-macroglobulin | 167.58 | 9.56  | 1.95 |

|            |                                              |        |      |      |
|------------|----------------------------------------------|--------|------|------|
| P01030     | Complement C4                                | 101.89 | 5.76 | 0.21 |
| F1MKS5     | Histidine-rich glycoprotein                  | 60.74  | 5.74 | 0.22 |
| P15497     | Apolipoprotein A-I                           | 30.28  | 4.61 | 0.15 |
| A0A140T881 | Apolipoprotein E                             | 36.04  | 3.74 | 0.13 |
| F1MMD7     | Inter-alpha-trypsin inhibitor heavy chain H4 | 101.53 | 3.72 | 0.19 |
| Q8SPP7     | Oligosaccharide-binding protein              | 21.06  | 3.60 | 0.05 |
| F1N3Q7     | Apolipoprotein A-IV                          | 42.99  | 2.93 | 0.15 |
| Q28085     | Complement factor H                          | 140.37 | 2.86 | 0.14 |
| Q2UVX4     | Complement C3                                | 187.25 | 2.22 | 0.20 |
| Q29443     | Transferrin                                  | 77.75  | 1.65 | 0.04 |
| F1N3A1     | Thrombospondin-1                             | 129.39 | 1.31 | 0.05 |
| A5PJT7     | ECM1 protein                                 | 57.64  | 1.25 | 0.03 |
| P81187     | Complement factor B                          | 85.37  | 1.20 | 0.15 |
| P13384     | Insulin-like growth factor-binding protein 2 | 34.02  | 0.95 | 0.02 |
| Q3SZV7     | Hemopexin                                    | 52.21  | 0.78 | 0.02 |
| F1MM32     | Sulfhydryl oxidase                           | 63.00  | 0.71 | 0.04 |
| P56425     | Cathelicidin-7                               | 18.85  | 0.64 | 0.01 |
| Q58DP6     | Ribonuclease 4                               | 16.94  | 0.56 | 0.06 |
| F1MD76     | Folliculin interacting protein 2             | 111.33 | 0.50 | 0.41 |
| P23805     | Conglutinin                                  | 38.00  | 0.46 | 0.03 |
| E1BNR0     | Apolipoprotein B                             | 515.76 | 0.46 | 0.03 |
| E1B726     | Plasminogen                                  | 91.24  | 0.41 | 0.05 |
| F1MUT4     | Coagulation factor XI                        | 69.89  | 0.39 | 0.01 |
| Q3MHN2     | Complement component C9                      | 62.00  | 0.34 | 0.13 |
| G5E5V1     | Uncharacterized protein                      | 14.48  | 0.33 | 0.24 |
| Q3ZBS7     | Vitronectin                                  | 53.58  | 0.31 | 0.02 |
| F1MSZ6     | Antithrombin-III                             | 52.44  | 0.30 | 0.01 |

| NH <sub>2</sub> -SBA-15T <sub>60</sub> |                                              |        |       |      |
|----------------------------------------|----------------------------------------------|--------|-------|------|
| Accession Number                       | Entry name                                   | Mass   | %RPA  | SD   |
| Q7SIH1                                 | Alpha-2-macroglobulin                        | 167.58 | 15.82 | 1.29 |
| A0A140T881                             | Apolipoprotein E                             | 36.04  | 9.99  | 0.57 |
| A0A140T897                             | Serum albumin                                | 69.32  | 9.67  | 0.41 |
| F1N1I6                                 | Gelsolin                                     | 85.69  | 7.34  | 0.88 |
| P01030                                 | Complement C4                                | 101.89 | 7.01  | 0.62 |
| P15497                                 | Apolipoprotein A-I                           | 30.28  | 6.62  | 0.65 |
| F1MKS5                                 | Histidine-rich glycoprotein                  | 60.74  | 4.53  | 0.08 |
| Q8SPP7                                 | Oligosaccharide-binding protein              | 21.06  | 4.49  | 0.33 |
| Q2UVX4                                 | Complement C3                                | 187.25 | 3.74  | 0.50 |
| F1N3Q7                                 | Apolipoprotein A-IV                          | 42.99  | 3.16  | 0.16 |
| F1MMD7                                 | Inter-alpha-trypsin inhibitor heavy chain H4 | 101.53 | 3.03  | 0.54 |
| Q28085                                 | Complement factor H                          | 140.37 | 2.20  | 0.04 |

|        |                                              |        |          |          |
|--------|----------------------------------------------|--------|----------|----------|
| F1N3A1 | Thrombospondin-1                             | 129.39 | 1.72     | 0.07     |
| Q2KJF1 | Alpha-1B-glycoprotein                        | 53.55  | 1.21     | 0.04     |
| F1MSZ6 | Antithrombin-III                             | 52.44  | 1.05     | 0.04     |
| Q58DP6 | Ribonuclease 4                               | 16.94  | 0.93     | 0.05     |
| P13384 | Insulin-like growth factor-binding protein 2 | 34.02  | 0.92     | 0.02     |
| A5PJT7 | ECM1 protein                                 | 57.64  | 0.87     | 0.04     |
| P56425 | Cathelicidin-7                               | 18.85  | 0.84     | 0.07     |
| F1MMP5 | Inter-alpha-trypsin inhibitor heavy chain H1 | 101.24 | 0.81     | 0.00     |
| Q3SZV7 | Hemopexin                                    | 52.21  | 0.79     | 0.02     |
| G3X6K8 | Haptoglobin                                  | 44.87  | 0.71     | 0.03     |
| Q3ZBS7 | Vitronectin                                  | 53.575 | 0.695795 | 0.035756 |
| F1MM32 | Sulfhydryl oxidase                           | 62.998 | 0.594126 | 0.044537 |
| P00735 | Prothrombin                                  | 70.506 | 0.500731 | 0.008457 |
| Q29437 | Serum amine oxidase                          | 84.757 | 0.470461 | 0.048305 |
| Q29443 | Transferrin                                  | 77.753 | 0.451378 | 0.016845 |
| E1B726 | Plasminogen                                  | 91.243 | 0.448954 | 0.050071 |
| F1MW79 | Uncharacterized protein                      | 30.881 | 0.447608 | 0.347964 |
| P02070 | Hemoglobin subunit beta                      | 15.954 | 0.44516  | 0.027268 |

| <b>NH<sub>2</sub>-SBA-15T<sub>120</sub></b> |                                              |             |             |           |
|---------------------------------------------|----------------------------------------------|-------------|-------------|-----------|
| <b>Accession Number</b>                     | <b>Entry name</b>                            | <b>Mass</b> | <b>%RPA</b> | <b>SD</b> |
| A0A140T897                                  | Serum albumin                                | 69.32       | 20.33       | 0.54      |
| Q7SIH1                                      | Alpha-2-macroglobulin                        | 167.58      | 11.74       | 1.09      |
| F1N1I6                                      | Gelsolin                                     | 85.69       | 8.62        | 0.70      |
| F1MMD7                                      | Inter-alpha-trypsin inhibitor heavy chain H4 | 101.53      | 7.63        | 0.03      |
| A0A140T881                                  | Apolipoprotein E                             | 36.04       | 7.34        | 0.30      |
| P01030                                      | Complement C4                                | 101.89      | 7.16        | 0.65      |
| P15497                                      | Apolipoprotein A-I                           | 30.28       | 5.32        | 0.30      |
| F1N3A1                                      | Thrombospondin-1                             | 129.39      | 3.05        | 0.02      |
| Q28085                                      | Complement factor H                          | 140.37      | 2.95        | 0.13      |
| Q2UVX4                                      | Complement C3                                | 187.25      | 2.42        | 0.03      |
| Q8SPP7                                      | Oligosaccharide-binding protein              | 21.06       | 2.32        | 0.15      |
| F1MSZ6                                      | Antithrombin-III                             | 52.44       | 2.12        | 0.08      |
| F1N3Q7                                      | Apolipoprotein A-IV                          | 42.99       | 1.91        | 0.06      |
| F1MKS5                                      | Histidine-rich glycoprotein                  | 60.74       | 1.88        | 0.05      |
| P13384                                      | Insulin-like growth factor-binding protein 2 | 34.02       | 1.50        | 0.09      |
| A5PJT7                                      | ECM1 protein                                 | 57.64       | 1.36        | 0.06      |
| Q29443                                      | Transferrin                                  | 77.75       | 0.80        | 0.03      |
| Q3SZV7                                      | Hemopexin                                    | 52.21       | 0.72        | 0.06      |
| E1BKZ0                                      | Pericentrin                                  | 327.24      | 0.71        | 1.00      |
| Q3ZBS7                                      | Vitronectin                                  | 53.58       | 0.60        | 0.02      |
| G3X6K8                                      | Haptoglobin                                  | 44.87       | 0.56        | 0.06      |
| Q58DP6                                      | Ribonuclease 4                               | 16.94       | 0.54        | 0.02      |

|        |                       |        |      |      |
|--------|-----------------------|--------|------|------|
| P56425 | Cathelicidin-7        | 18.85  | 0.53 | 0.03 |
| F1MM32 | Sulfhydryl oxidase    | 63.00  | 0.40 | 0.01 |
| P00735 | Prothrombin           | 70.51  | 0.39 | 0.01 |
| E1B726 | Plasminogen           | 91.24  | 0.37 | 0.01 |
| B8Y9S9 | Fibronectin           | 262.43 | 0.35 | 0.02 |
| F1MMK9 | Protein AMBP          | 39.29  | 0.33 | 0.01 |
| Q2KJF1 | Alpha-1B-glycoprotein | 53.55  | 0.28 | 0.02 |
| G3MYM8 | Proteoglycan 4        | 116.92 | 0.25 | 0.00 |

1. A. E. Garcia-Bennett, O. Terasaki, S. Che and T. Tatsumi, *Chemistry of Materials*, 2004, **16**, 813-821.
2. K. Lund, A. E. Garcia-Bennett and O. Terasaki, *Journal of Materials Chemistry*, 2007, **17**, 3622-3629.
3. M. Kruk, M. Jaroniec, C. H. Ko and R. Ryoo, *Chemistry of Materials*, 2000, **12**, 1961-1968.
4. D. Docter, U. Distler, W. Storck, J. Kuharev, D. Wünsch, A. Hahlbrock, S. K. Knauer, S. Tenzer and R. H. Stauber, *Nature Protocols*, 2014, **9**, 2030.
